# Supplementary material for: ATG6 interacting with NPR1 increases Arabidopsis thaliana resistance to Pst DC3000/avrRps4 by increasing its nuclear accumulation and stability
Source: eLife journal article supplement (doi:10.7554/elife.97206), 2024-04-30
Supplement: fig1-data3 [file elife-97206-fig1-data3-v1.zip]

## Sheet: Sheet1
Relative YFP Fluorescence intensity
ATG6-cYFP + NPR1-nYFP	ATG6-cYFP + nYFP	cYFP + NPR1-nYFP	NPR1-nYFP + SnRK2.8-cYFP	nYFP + SnRK2.8-cYFP
91.4314	0	0	40.694	0
83.254	0	0	102.218	0
98.4372	0	0	218.073	0
87.8609	0	0	46.7613	0
87.8609	0	0	110.295	0
97.2754	0	0	156.371	0
45.9292	0	0	212.353	0
114.772	0	0	206.303	0
120.106	0	0	180.467	0
132.133	0	0	119.009	0
42.6681	0	0	110.098	0
72.9811	0	0	122.75	0
32.8888	0	0	93.8081	0
118.251	0	0	62.1763	0
129.619	0	0		0
77.7501	0	0		0
