# Supplementary material for: ATG6 interacting with NPR1 increases Arabidopsis thaliana resistance to Pst DC3000/avrRps4 by increasing its nuclear accumulation and stability
Source: eLife journal article supplement (doi:10.7554/elife.97206), 2024-04-30
Supplement: fig3-data3 [file elife-97206-fig3-data3-v1.zip]

## Sheet: Sheet1
Nuclear localization of NPR1-GFP numbers (per section)
NPR1-GFP	ATG6-mCherry × NPR1-GFP		P-value
5	34		1.41458e-05	**
6	28
8	20
7	5
9	19
6	10
7	16
2	20
20	20
7	13
14	12
7	14
9	18
10	24
7	20
12	23
	24
