# Supplementary material for: ATG6 interacting with NPR1 increases Arabidopsis thaliana resistance to Pst DC3000/avrRps4 by increasing its nuclear accumulation and stability
Source: eLife journal article supplement (doi:10.7554/elife.97206), 2024-04-30
Supplement: fig3-data3 [file Figure 3d.xlsx]

## Sheet: Sheet1
	The ratio of NPR1 in the nucleus/total NPR1
	0.5 mM SA	repeat 1	repeat 2	repeat 3
NPR1-GFP	0 h	6.16	6.28	6.41
	3 h	6.66	7.8	11.69
	6 h	11.63	10.45	13.67
ATG6-mCherry × NPR1-GFP	0 h	5.13	6.43	8.42
	3 h	8.1	7.1	9.91
	6 h	13.14	12.67	12.22
