# Supplementary material for: ATG6 interacting with NPR1 increases Arabidopsis thaliana resistance to Pst DC3000/avrRps4 by increasing its nuclear accumulation and stability
Source: eLife journal article supplement (doi:10.7554/elife.97206), 2024-04-30
Supplement: fig3-data3 [file Figure 3f.xlsx]

## Sheet: Sheet1
	1 mM SA	The ratio of NPR1 in the nucleus/total NPR1
		repeat 1	repeat 2
NPR1-GFP	8 h	19.79	16.78
	20 h	26.79	18.56
ATG6-mCherry + NPR1-GFP	8 h	14.2	17.23
	20 h	30.63	23.1
