# Supplementary material for: ATG6 interacting with NPR1 increases Arabidopsis thaliana resistance to Pst DC3000/avrRps4 by increasing its nuclear accumulation and stability
Source: eLife journal article supplement (doi:10.7554/elife.97206), 2024-04-30
Supplement: fig3-figsupp2-data2 [file elife-97206-fig3-figsupp2-data2-v1.zip]

**Arabidopsis**

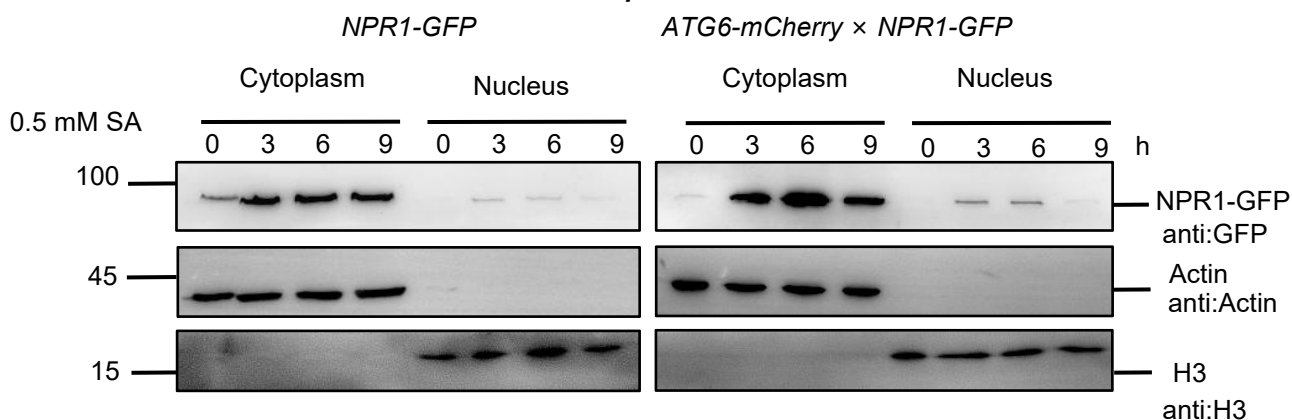

**Fig 3c repeat 2**

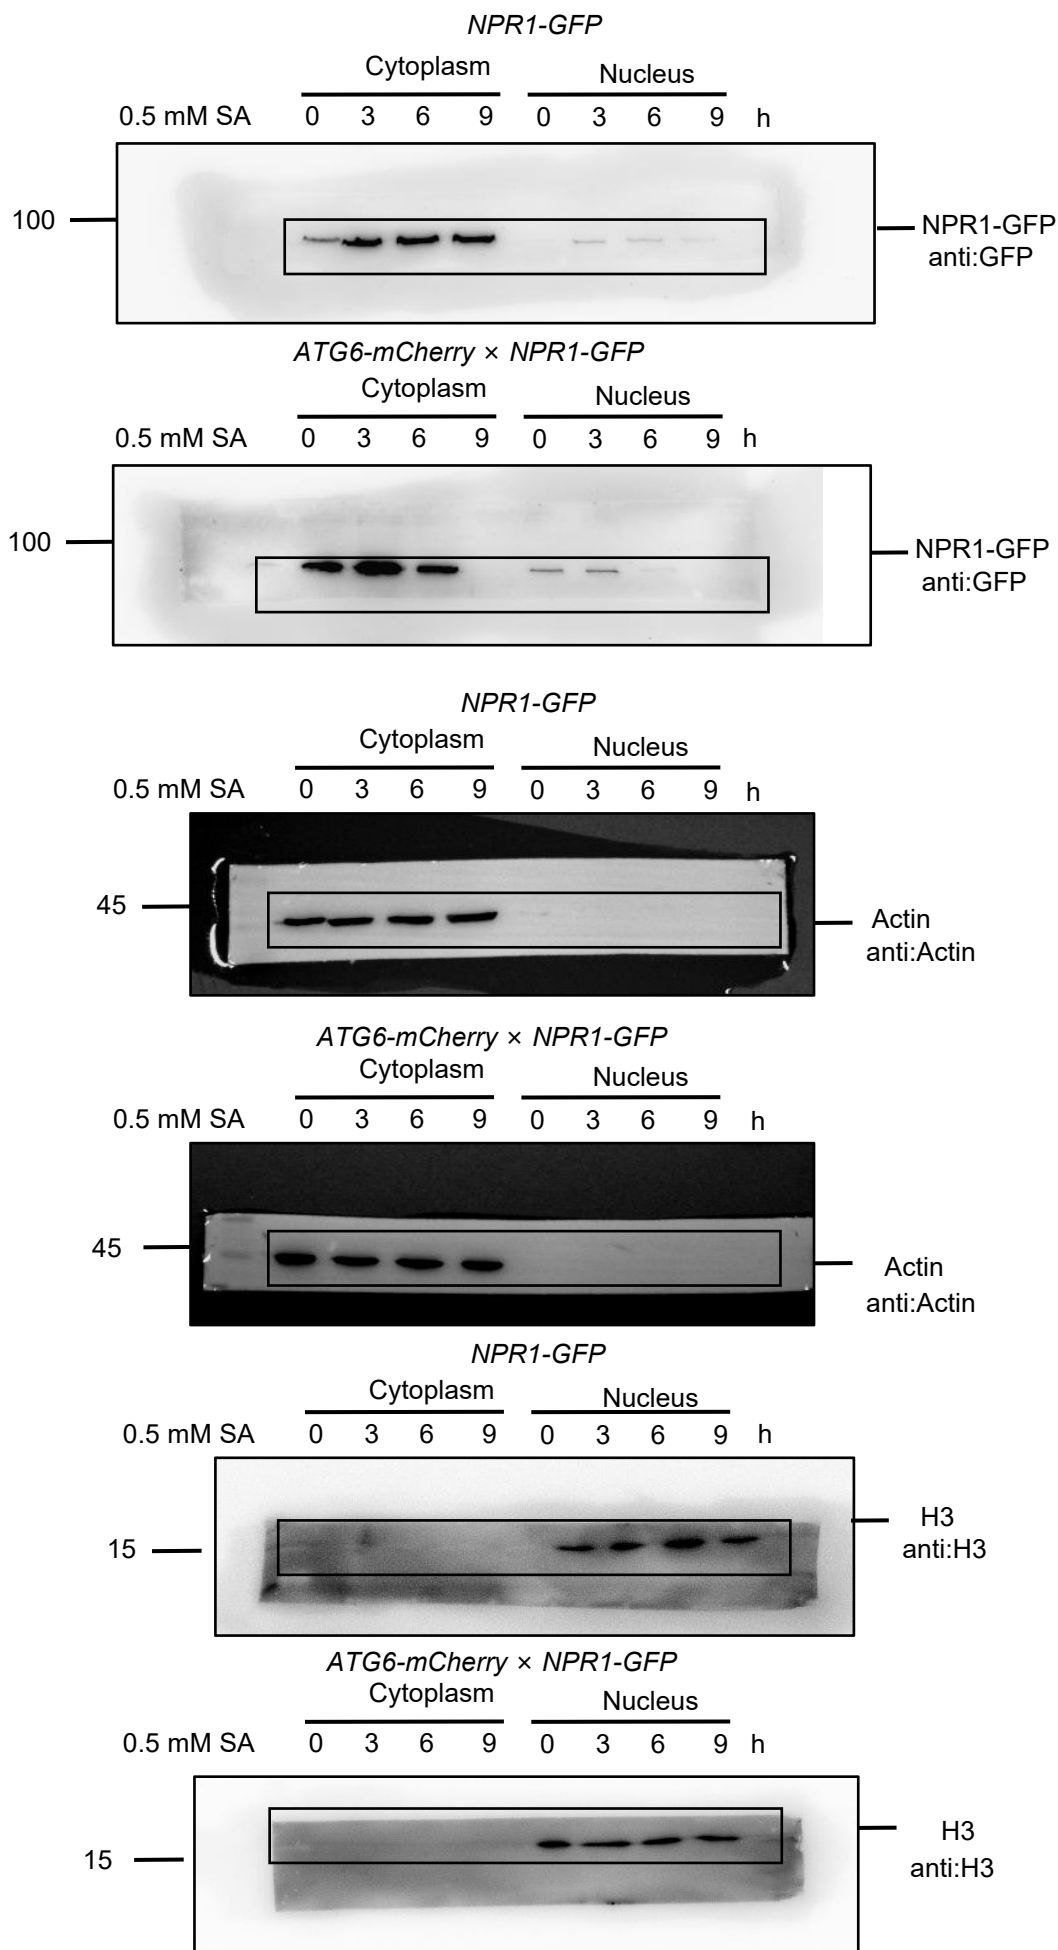

**Figure 3-figure supplement 2 ATG6 increases the nuclear accumulation of NPR1 under SA treatment.**
