# Supplementary material for: ATG6 interacting with NPR1 increases Arabidopsis thaliana resistance to Pst DC3000/avrRps4 by increasing its nuclear accumulation and stability
Source: eLife journal article supplement (doi:10.7554/elife.97206), 2024-04-30
Supplement: fig3-figsupp3-data1 [file elife-97206-fig3-figsupp3-data1-v1.zip]

## Sheet: Sheet1
	Relative chlorophyll content (%)
	Control	Dark
Col	100.042	58.9667
	100.042	58.8465
	100.042	58.8465
amiRNAATG6 # 1	90.2087	31.8475
	90.2087	31.726
	90.4732	31.5639
amiRNAATG6 # 2	92.8464	19.8552
	92.8464	19.8552
	92.8464	19.8867
ATG6-mCherry	100.828	65.5177
	99.9904	65.5177
	99.9904	65.5177
ATG6-GFP	89.1889	62.8242
	89.1889	62.8242
	89.1889	62.9217
atg5-1	94.9452	13.8909
	94.9452	13.7742
	94.9452	13.852
