# Supplementary material for: ATG6 interacting with NPR1 increases Arabidopsis thaliana resistance to Pst DC3000/avrRps4 by increasing its nuclear accumulation and stability
Source: eLife journal article supplement (doi:10.7554/elife.97206), 2024-04-30
Supplement: fig4-data1 [file elife-97206-fig4-data1-v1.zip]

## Sheet: Sheet1
	Relativated mRNA expression of PR5
	NPR1-GFP	ATG6-mCherry × NPR1-GFP
0 h	1.17885	5.16658	repeat 1
	0.837561	4.09702	repeat 2
	1.0128	4.60859	repeat 3
3 h	0.919962	7.65051	repeat 1
	1.29973	9.56686	repeat 2
	1.2002	9.86314	repeat 3
6 h	6.65693	39.6673	repeat 1
	6.58603	33.4433	repeat 2
	7.065	34.0137	repeat 3
