# Supplementary material for: ATG6 interacting with NPR1 increases Arabidopsis thaliana resistance to Pst DC3000/avrRps4 by increasing its nuclear accumulation and stability
Source: eLife journal article supplement (doi:10.7554/elife.97206), 2024-04-30
Supplement: fig4-data1 [file Figure 4a.xlsx]

## Sheet: Sheet1
	free SA µg/g F.W.
	Normal	Pst DC3000/AvrRps4 for 12 h
NPR1-GFP	0.0809928	1.60524	repeat 1
	0.104378	1.35961	repeat 2
ATG6-mCherry × NPR1-GFP	0.0635142	4.01629	repeat 1
	0.0873504	4.6827	repeat 2
	0.0642812	5.61161	repeat 3
