# Supplementary material for: ATG6 interacting with NPR1 increases Arabidopsis thaliana resistance to Pst DC3000/avrRps4 by increasing its nuclear accumulation and stability
Source: eLife journal article supplement (doi:10.7554/elife.97206), 2024-04-30
Supplement: fig4-data1 [file Figure 4b.xlsx]

## Sheet: Sheet1
	Relativated mRNA expression of PR1
	NPR1-GFP	ATG6-mCherry × NPR1-GFP
0 h	1.11155	24.7615	repeat 1
	0.799171	20.1022	repeat 2
	1.12572	19.8927	repeat 3
3 h	71.5132	292.186	repeat 1
	67.1926	296.652	repeat 2
	45.1443	163.161	repeat 3
6 h	439.742	922.707	repeat 1
	268.857	850.24	repeat 2
	314.297	956.752	repeat 3
