# Supplementary material for: ATG6 interacting with NPR1 increases Arabidopsis thaliana resistance to Pst DC3000/avrRps4 by increasing its nuclear accumulation and stability
Source: eLife journal article supplement (doi:10.7554/elife.97206), 2024-04-30
Supplement: fig4-figsupp1-data1 [file elife-97206-fig4-figsupp1-data1-v1.zip]

## Sheet: Sheet1
		Relativated mRNA expression of ICS1
		NPR1-GFP	ATG6-mCherry × NPR1-GFP
	0 h	0.905175	6.01525	repeat 1
		1	6.56613	repeat 2
		1.10476	5.20518	repeat 3
	SA for 6 h	7.04787	11.9745	repeat 1
		6.69582	11.2395	repeat 2
		6.36135	10.9866	repeat 3
