# Supplementary material for: ATG6 interacting with NPR1 increases Arabidopsis thaliana resistance to Pst DC3000/avrRps4 by increasing its nuclear accumulation and stability
Source: eLife journal article supplement (doi:10.7554/elife.97206), 2024-04-30
Supplement: fig4-figsupp2-data1 [file elife-97206-fig4-figsupp2-data1-v1.zip]

## Sheet: Sheet1
	Relativated mRNA expression of PR1
	0 h	6 h
Col	1	2.40024	repeat 1
	1.04474	2.34284	repeat 2
	0.957175	1.09451	repeat 3
ATG6-mCherry	1.11136	9.20252	repeat 1
	0.850521	9.68852	repeat 2
	1.22649	8.74091	repeat 3
	Relativated mRNA expression of PR5
	0 h	6 h
Col	0.875879	2.41863	repeat 1
	1.0811	1.69441	repeat 2
	1.05606	1.76932	repeat 3
ATG6-mCherry	1.31501	2.78992	repeat 1
	1.05006	2.8984	repeat 2
	0.746438	2.68551	repeat 3
