# Supplementary material for: ATG6 interacting with NPR1 increases Arabidopsis thaliana resistance to Pst DC3000/avrRps4 by increasing its nuclear accumulation and stability
Source: eLife journal article supplement (doi:10.7554/elife.97206), 2024-04-30
Supplement: fig5-data3 [file elife-97206-fig5-data3-v1.zip]

## Sheet: Sheet1
SINCs-like condensates number（per section）
NPR1-GFP	ATG6-mCherry × NPR1-GFP		P-value
6	13		3.38945e-05	**
2	31
3	27
5	36
3	76
4	15
7	23
6	31
24	34
30	31
16	11
17	13
36	27
38	20
42	40
33	35
55	44
8	11
10	143
10	79
5	80
6	94
14	19
11	34
5	75
10	52
7	82
	67
	60
