# Supplementary material for: ATG6 interacting with NPR1 increases Arabidopsis thaliana resistance to Pst DC3000/avrRps4 by increasing its nuclear accumulation and stability
Source: eLife journal article supplement (doi:10.7554/elife.97206), 2024-04-30
Supplement: fig5-figsupp2-data1 [file elife-97206-fig5-figsupp2-data1-v1.zip]

## Sheet: Sheet1
	Relativated mRNA expression of NPR1
	Col	ATG6-mCherry
0 h	0.729114	2.0305	repeat 1
	1.22534	2.18112	repeat 2
	1.11931	1.89185	repeat 3
3 h	7.23659	3.82489	repeat 1
	10.0443	3.03459	repeat 2
	10.8559	4.40744	repeat 3
6 h	1.72567	0.830207	repeat 1
	1.11348	1.07179	repeat 2
	1.21152	0.963189	repeat 3
