# Supplementary material for: ATG6 interacting with NPR1 increases Arabidopsis thaliana resistance to Pst DC3000/avrRps4 by increasing its nuclear accumulation and stability
Source: eLife journal article supplement (doi:10.7554/elife.97206), 2024-04-30
Supplement: fig6-data3 [file elife-97206-fig6-data3-v1.zip]

## Sheet: Sheet1
		NPR1-GFP degradation rate (%)
	CHX for	repeat 1	repeat 2	repeat 3
NPR1-GFP	0 h	100	100	100
	3 h	35.9613	39.08	43.9629
	6 h	34.2545	32.4889	39.1221
	9 h	17.791	15.5296	23.059
ATG6-mCherry × NPR1-GFP	0 h	100	100	100
	3 h	84.5819	105.813	86.4027
	6 h	92.7243	89.3762	98.8733
	9 h	49.6219	62.9388	62.0863
