# Supplementary material for: ATG6 interacting with NPR1 increases Arabidopsis thaliana resistance to Pst DC3000/avrRps4 by increasing its nuclear accumulation and stability
Source: eLife journal article supplement (doi:10.7554/elife.97206), 2024-04-30
Supplement: fig6-data3 [file Figure 6 b.xlsx]

## Sheet: Sheet1
	Relativated band intenstiy of NPR1-GFP Protein
	NPR1-GFP					ATG6-mCherry × NPR1-GFP
min	repeat 1	repeat 2	repeat 3		min	repeat 1	repeat 2	repeat 3
0	100	100	100		0	100	100	100
30	34.35	31.24	41.21		30	99.11	99.12	99.2
60	17.45	14.65	22.23		60	97.12	91.4	92.63
120	8.59	6.31	11.12		120	66.41	52.12	53.1
180	5.06	4.11	6.72		180	35.34	31.01	25.9
