# Supplementary material for: ATG6 interacting with NPR1 increases Arabidopsis thaliana resistance to Pst DC3000/avrRps4 by increasing its nuclear accumulation and stability
Source: eLife journal article supplement (doi:10.7554/elife.97206), 2024-04-30
Supplement: fig6-data3 [file Figure 6 f.xlsx]

## Sheet: Sheet1
			NPR1-GFP degradation rate (%)
		CHX for	repeat 1	repeat 2	repeat 3		repeat 1	repeat 2	repeat 3
	NPR1-GFP	0 h	100	100	100	NPR1-GFP/atg5	100	100	100
		4 h	61.84	61.13	61.48		75.36	69.22	60.93
		6 h	56.06	54.32	59.59		59.72	49.56	45.31
		8 h	50.77	45.89	54.59		41.64	43.3	40.34
