# Supplementary material for: ATG6 interacting with NPR1 increases Arabidopsis thaliana resistance to Pst DC3000/avrRps4 by increasing its nuclear accumulation and stability
Source: eLife journal article supplement (doi:10.7554/elife.97206), 2024-04-30
Supplement: fig6-figsupp1-data3 [file elife-97206-fig6-figsupp1-data3-v1.zip]

## Sheet: Sheet1
			Relativated band intenstiy of NPR1-GFP Protein
			NPR1-GFP					NPR1-GFP + ATG6-mCherry
		min	repeat 1	repeat 2	repeat 3		min	repeat 1	repeat 2	repeat 3
		0	100	100	100		0	100	100	100
		10	52.18	58.23	49.3		10	89.07	85	80.97
		30	28.38	40.22	20.34		30	62.25	64.34	62.12
		60	17.29	25.89	14.34		60	53	56.11	50.12
		120	14.93	20.32	11.89		120	34.3	37.65	33.23
		180	10.63	17.12	6.62		180	29.71	32.2	26.96
