# Supplementary material for: ATG6 interacting with NPR1 increases Arabidopsis thaliana resistance to Pst DC3000/avrRps4 by increasing its nuclear accumulation and stability
Source: eLife journal article supplement (doi:10.7554/elife.97206), 2024-04-30
Supplement: fig6-figsupp2-data2 [file elife-97206-fig6-figsupp2-data2-v1.zip]

***ATG6-mCherry* × *NPR1-GFP***

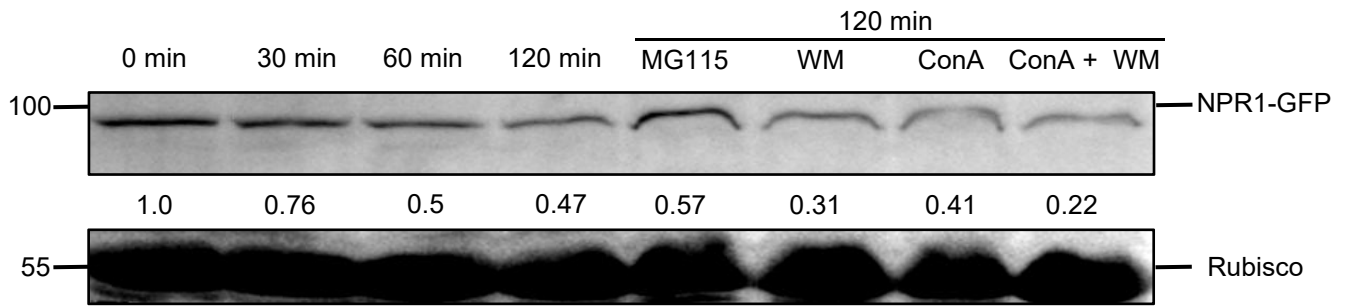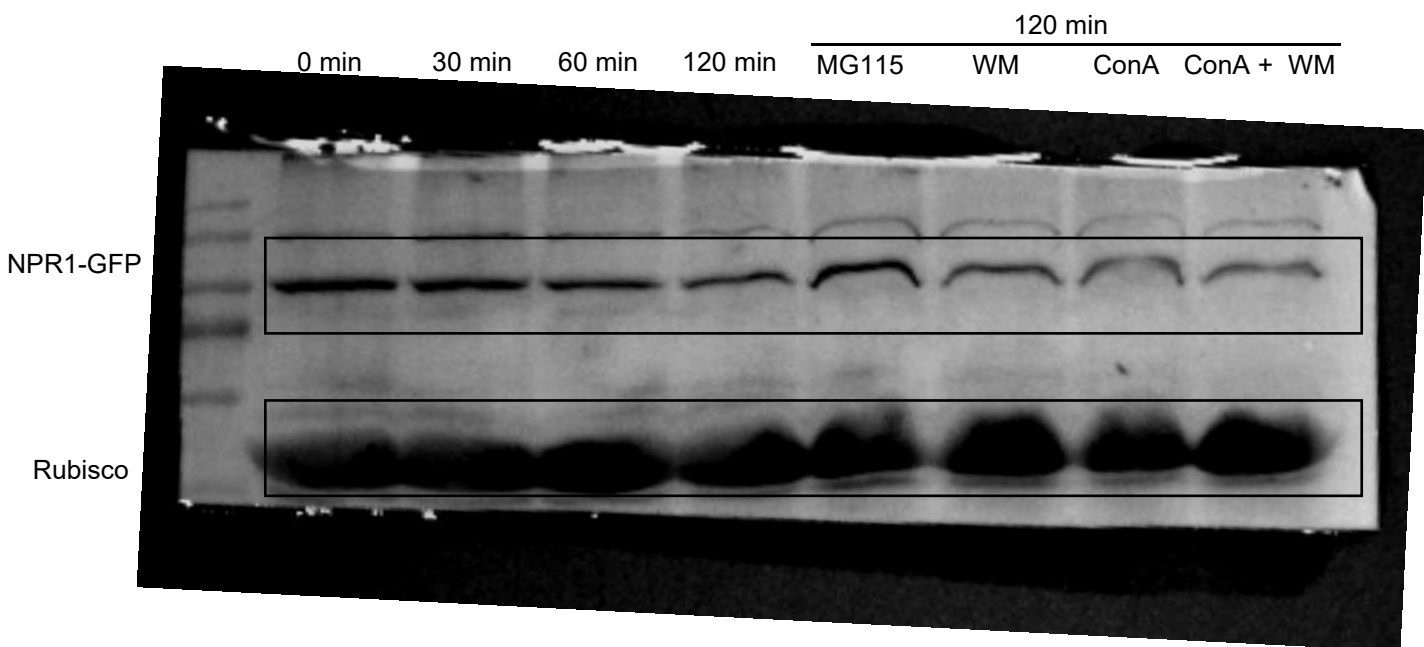

**Figure 6-figure supplement 2 NPR1-GFP degradation assay in *ATG6-mCherry* × *NPR1-GFP* Arabidopsis.**
