# Supplementary material for: ATG6 interacting with NPR1 increases Arabidopsis thaliana resistance to Pst DC3000/avrRps4 by increasing its nuclear accumulation and stability
Source: eLife journal article supplement (doi:10.7554/elife.97206), 2024-04-30
Supplement: fig7-data3 [file elife-97206-fig7-data3-v1.zip]

## Sheet: Sheet1
		Relativated mRNA expression of AtATG6
	0 h	0.84667	repeat 1
		1.12713	repeat 2
		1.04788	repeat 3
Pst DC3000/avrRps4	3 h	0.513172	repeat 1
		0.538619	repeat 2
		0.555927	repeat 3
	6 h	1.75173	repeat 1
		1.71331	repeat 2
		1.67438	repeat 3
	9 h	1.21991	repeat 1
		1.22341	repeat 2
		1.14768	repeat 3
	12 h	1.32073	repeat 1
		1.46656	repeat 2
		1.33118	repeat 3
	24 h	2.58185	repeat 1
		2.42289	repeat 2
		2.48587	repeat 3
