# Supplementary material for: ATG6 interacting with NPR1 increases Arabidopsis thaliana resistance to Pst DC3000/avrRps4 by increasing its nuclear accumulation and stability
Source: eLife journal article supplement (doi:10.7554/elife.97206), 2024-04-30
Supplement: fig7-data3 [file Figure 7b.xlsx]

## Sheet: Sheet1
		Relativated mRNA expression of AtATG6
0.5 mM SA	0 h	0.933165	repeat 1
		1.04374	repeat 2
		1.02671	repeat 3
	2 h	1.04419	repeat 1
		0.994066	repeat 2
		0.993204	repeat 3
	4 h	1.50233	repeat 1
		1.34432	repeat 2
		1.66939	repeat 3
	6 h	2.14016	repeat 1
		2.11833	repeat 2
		2.16645	repeat 3
	8 h	2.01829	repeat 1
		2.23067	repeat 2
		1.98072	repeat 3
