# Supplementary material for: ATG6 interacting with NPR1 increases Arabidopsis thaliana resistance to Pst DC3000/avrRps4 by increasing its nuclear accumulation and stability
Source: eLife journal article supplement (doi:10.7554/elife.97206), 2024-04-30
Supplement: fig7-data3 [file Figure 7d.xlsx]

## Sheet: Sheet1
Log (CFU/ c㎡) Pst DC3000/avrRps4
Negative control		AmiRNA-ATG6		atg5
6.3979		7.017		6.6128		repeat1
6.6556		6.8779		6.7597		repeat2
6.224		7.2304		7.1222		repeat3
5.8751		6.8011		6.899		repeat4
6.1973		7.0969		6.9017		repeat5
