# Supplementary material for: ATG6 interacting with NPR1 increases Arabidopsis thaliana resistance to Pst DC3000/avrRps4 by increasing its nuclear accumulation and stability
Source: eLife journal article supplement (doi:10.7554/elife.97206), 2024-04-30
Supplement: fig7-data3 [file Figure 7g.xlsx]

## Sheet: Sheet1
	Relativated mRNA expression of ATG6
	1 d			2 d			3 d
	repeat 1	repeat 2	repeat 3	repeat 1	repeat 2	repeat 3	repeat 1	repeat 2	repeat 3
Col	1.01953	1.01366	0.967627	0.92377	1.07713	1.005	0.817917	1.14932	1.06378
amiRNAATG6# 1	0.349145	0.289611	0.309387	0.226865	0.300346	0.375307	0.431727	0.325312	0.285733
amiRNAATG6# 2	0.568154	0.496469	0.402744	0.58492	0.480226	0.326954	0.252763	0.318831	0.238164
