# Supplementary material for: ATG6 interacting with NPR1 increases Arabidopsis thaliana resistance to Pst DC3000/avrRps4 by increasing its nuclear accumulation and stability
Source: eLife journal article supplement (doi:10.7554/elife.97206), 2024-04-30
Supplement: fig7-data3 [file Figure 7h.xlsx]

## Sheet: Sheet1
Log (CFU/ c㎡) Pst DC3000/avrRps4
Col	amiRNAATG6 # 1	amiRNAATG6 # 2
5.1461	5.3979	5.1973
5.0969	5.3847	5.2175
5	5.4698	5.3118
5	5.4735	5.3222
5.1461	5.3522	5.3473
5.15381	5.17609	5.31702
5.1383	5.6767	5.224
5.1538	5.243	5.2304
5.243	5.7597	5.1761
4.3979		5.3979
5.301		5.6532
5.243		5.243
5
