# Supplementary material for: ATG6 interacting with NPR1 increases Arabidopsis thaliana resistance to Pst DC3000/avrRps4 by increasing its nuclear accumulation and stability
Source: eLife journal article supplement (doi:10.7554/elife.97206), 2024-04-30
Supplement: fig7-data3 [file Figure 7i.xlsx]

## Sheet: Sheet1
Log (CFU/ c㎡) Pst DC3000/avrRps4
NG Negative control		NG AmiRNA-ATG6		NG atg5
4.7202		5.6675		5.8935		repeat1
4.5441		5.243		5.9777		repeat2
		5.4354		5.7763		repeat3
		5.1833		5.9626		repeat4
