# Supplementary material for: ATG6 interacting with NPR1 increases Arabidopsis thaliana resistance to Pst DC3000/avrRps4 by increasing its nuclear accumulation and stability
Source: eLife journal article supplement (doi:10.7554/elife.97206), 2024-04-30
Supplement: fig7-data3 [file Figure 7j.xlsx]

## Sheet: Sheet1
Log (CFU/ c㎡) Pst DC3000/avrRps4
Col		amiRNAATG6 # 1		amiRNAATG6 # 2		npr1		ATG6-mCherry		NPR1-GFP		ATG6-mCherry X NPR1-GFP
5.5119		6.0107		5.8451		5.7597		4.8603		4.7202		4.4393
5.301		5.942		5.9661		6.29		4.6021		4.8129		4.3979
5.0969		6.3711		5.3979		6.2788		4.699		4.699		4.3979
5.0107		5.6767		6.1303		6.3118		4.8751		4.699		4.4393
5.2304		5.5283		5.6968
		5.4878		5.5502
		5.4273
