# Supplementary material for: ATG6 interacting with NPR1 increases Arabidopsis thaliana resistance to Pst DC3000/avrRps4 by increasing its nuclear accumulation and stability
Source: eLife journal article supplement (doi:10.7554/elife.97206), 2024-04-30
Supplement: fig7-figsupp2-data1 [file elife-97206-fig7-figsupp2-data1-v1.zip]

## Sheet: Sheet1
The number of dead cells per section
Col		amiRNAATG6 # 1		amiRNAATG6 # 2		npr1		ATG6-mCherry		NPR1-GFP		ATG6-mCherry X NPR1-GFP
181		368		370		470		133		81		62
203		362		441		397		102		94		50
131		299		347		418		87		154		55
197		308		292		436		73		83		71
222		366		330		417		141		87		21
149		264		361		432		123		121		49
												65
