# Supplementary figures and images for: ATG6 interacting with NPR1 increases Arabidopsis thaliana resistance to Pst DC3000/avrRps4 by increasing its nuclear accumulation and stability
Source: eLife journal article supplement (doi:10.7554/elife.97206), 2024-04-30

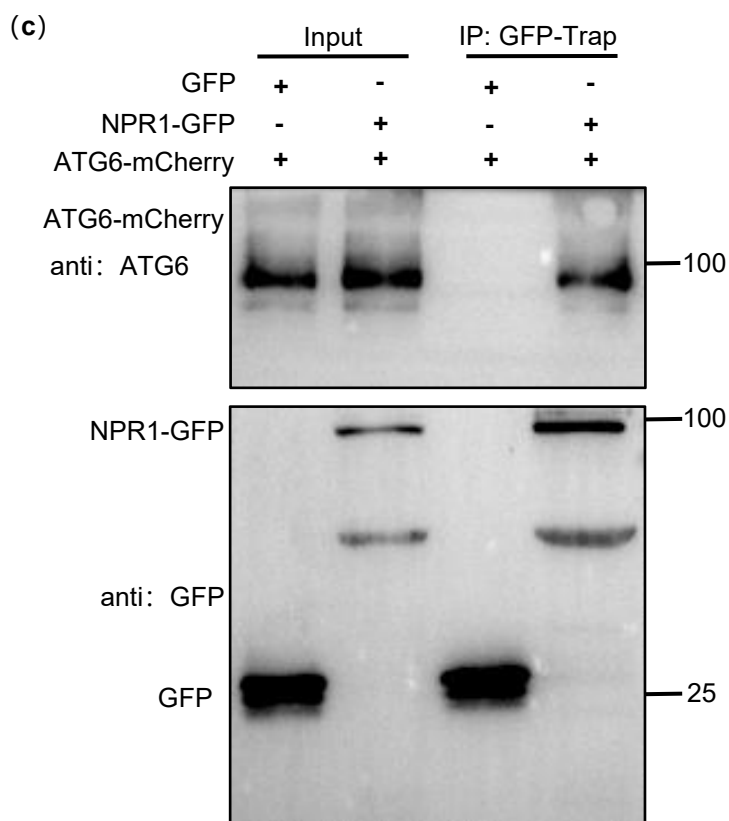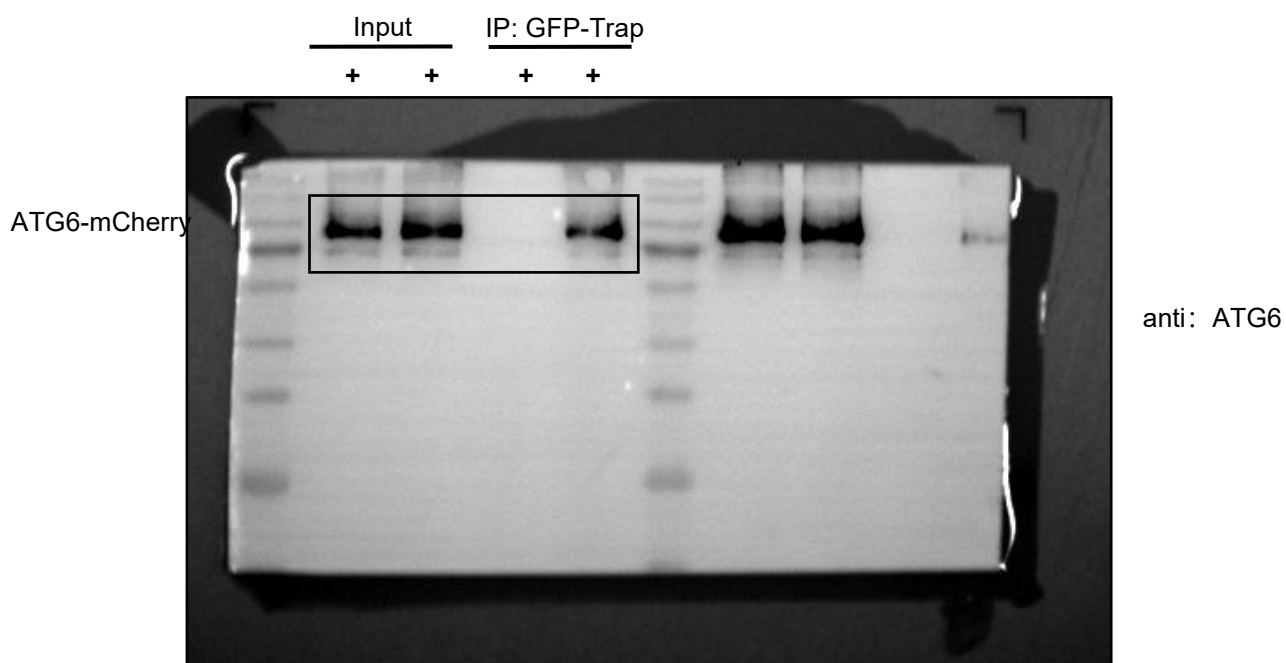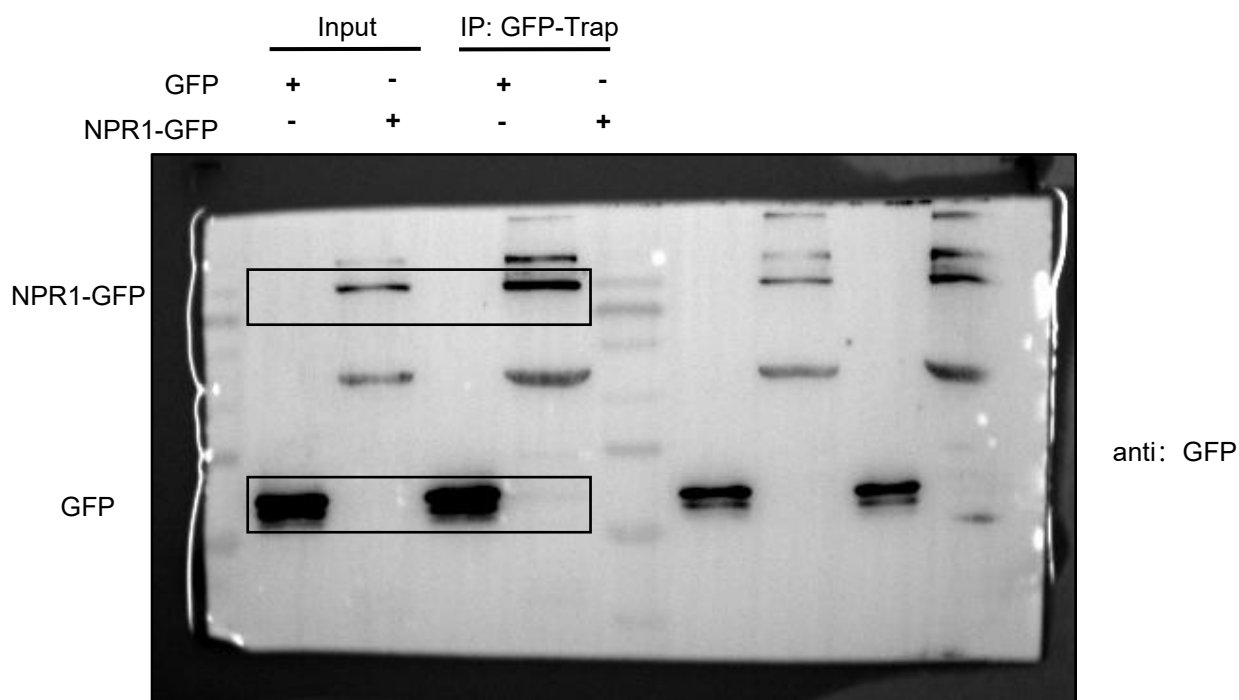

Figure 1. Physical interaction between NPR1 and ATG6.

Supplement: fig1-data2 [file elife-97206-fig1-data2-v1.zip]

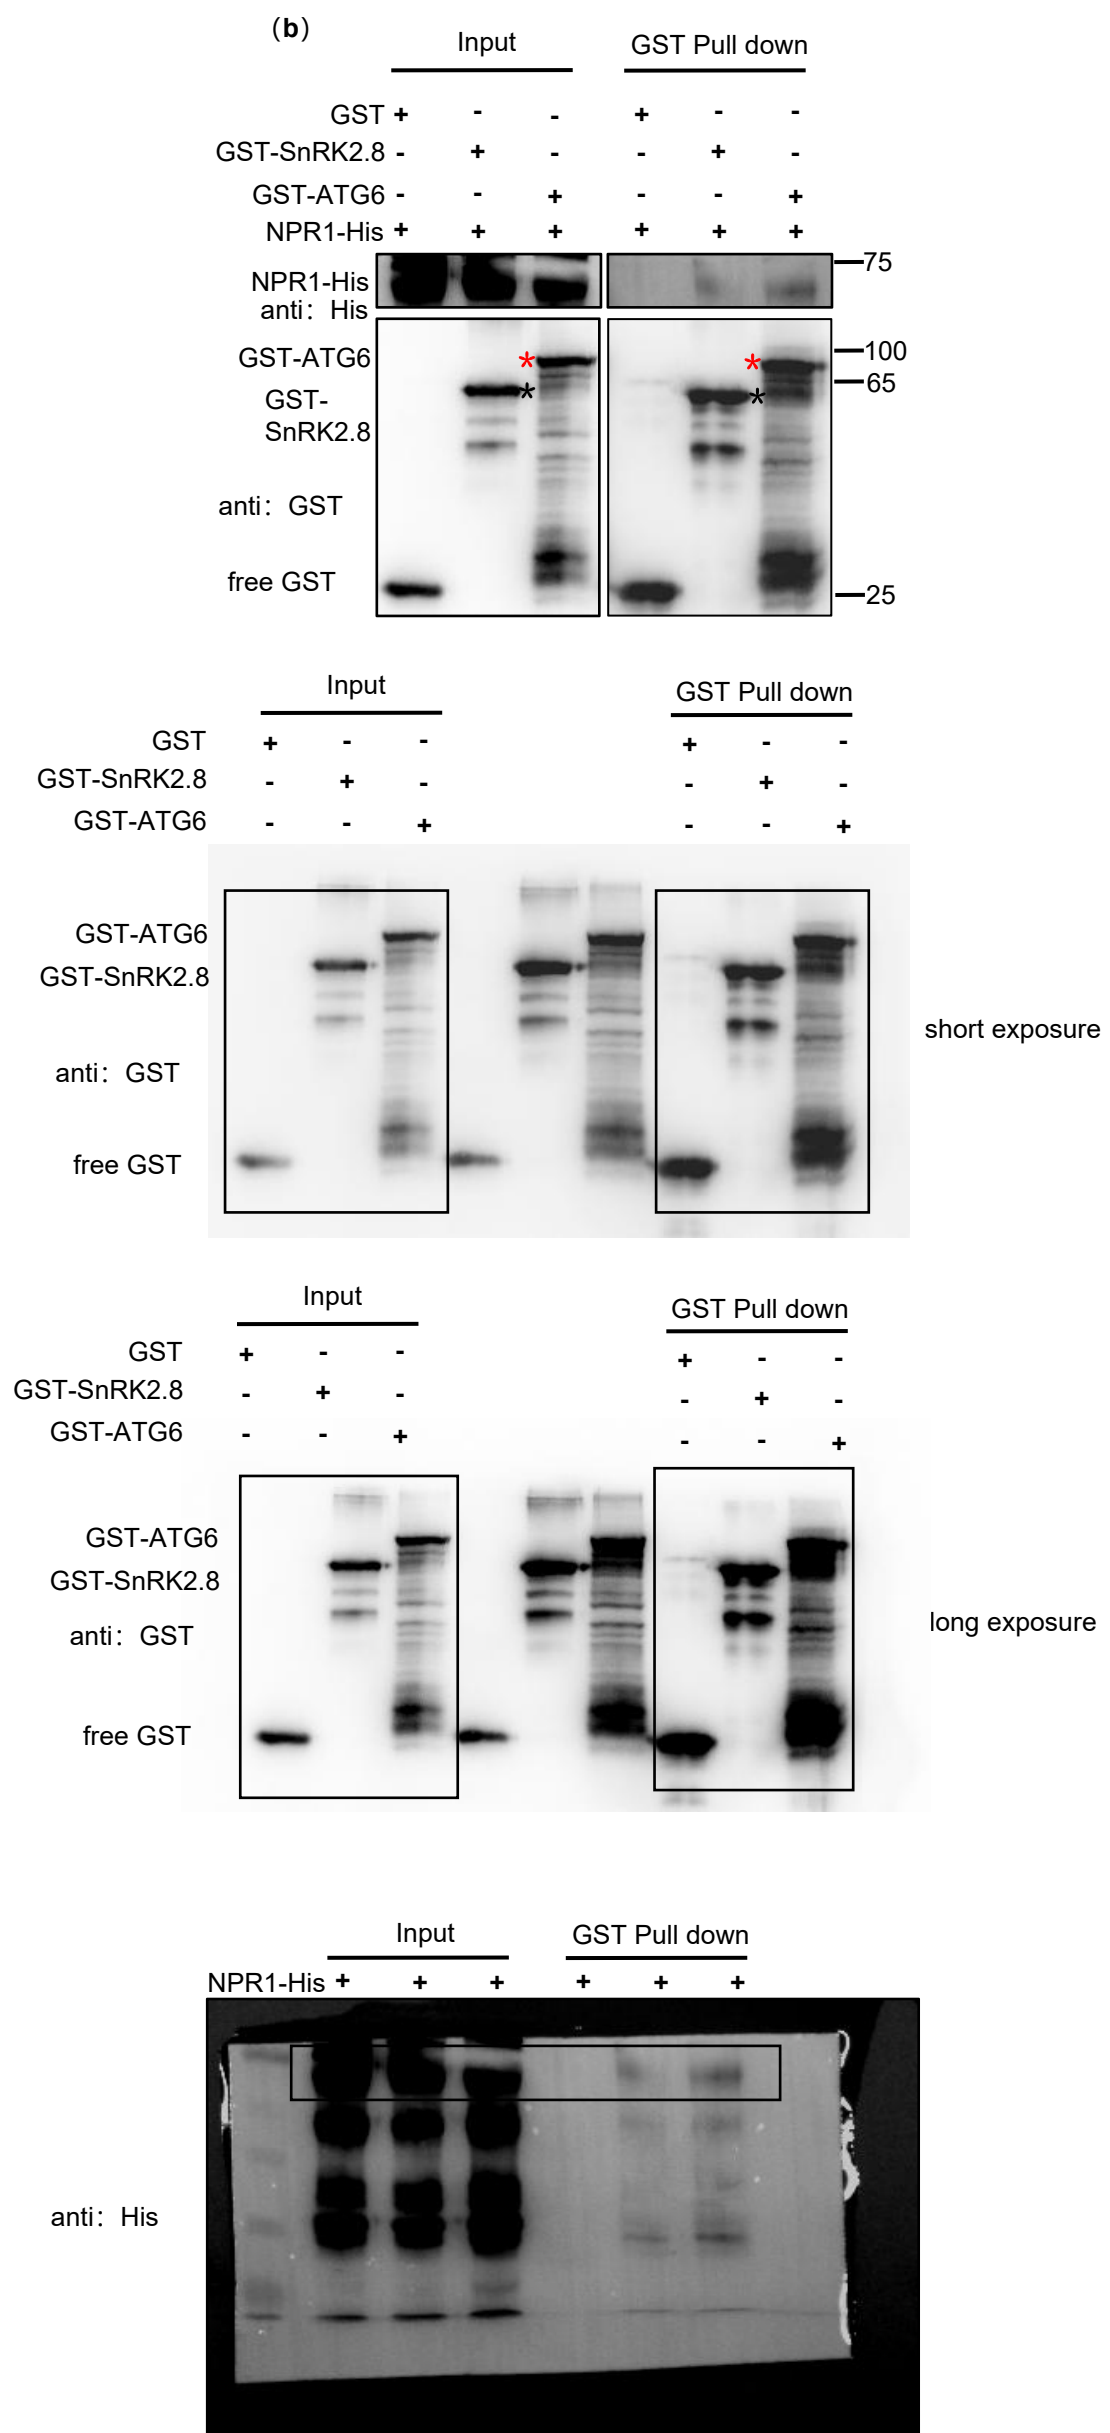

Figure 1. Physical interaction between NPR1 and ATG6.

Supplement: fig1-data2 [file elife-97206-fig1-data2-v1.zip]

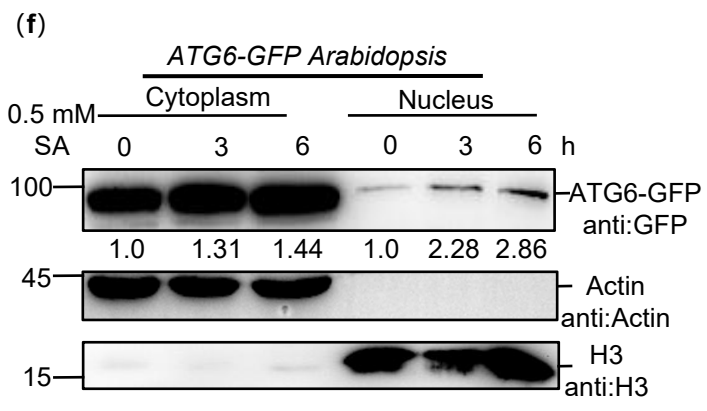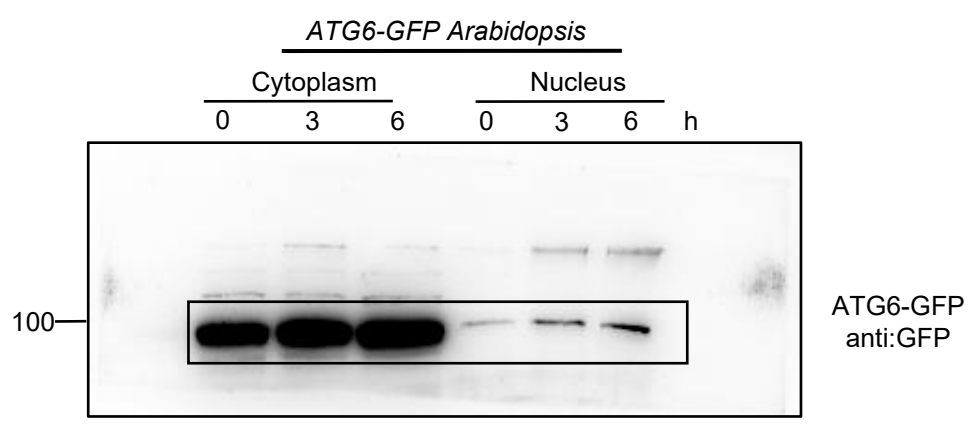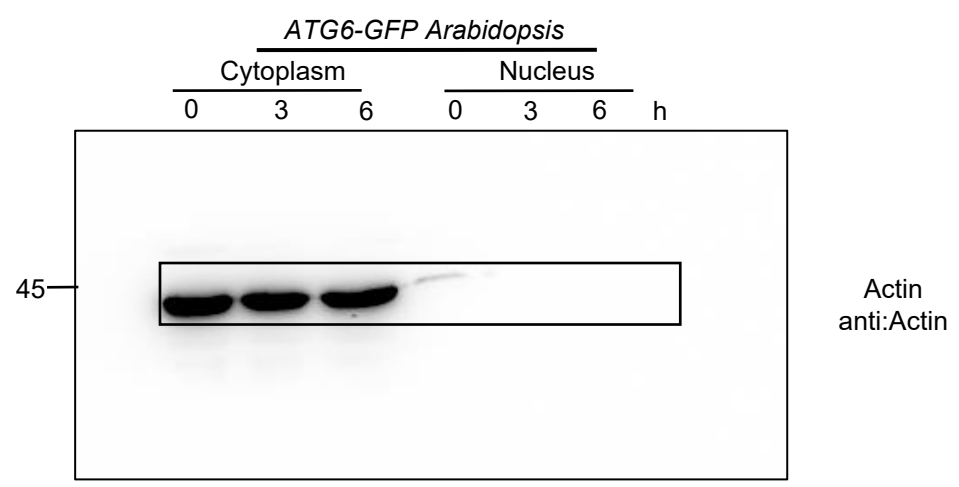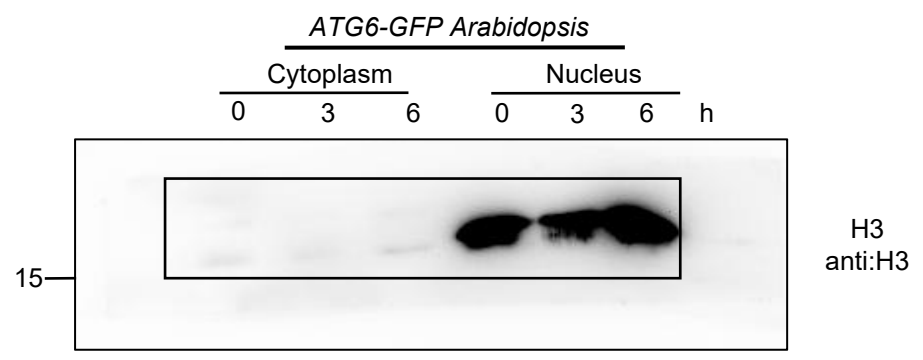

Figure 2. ATG6 is localized in the cytoplasm and nucleus

Supplement: fig2-data2 [file elife-97206-fig2-data2-v1.zip]

(g)

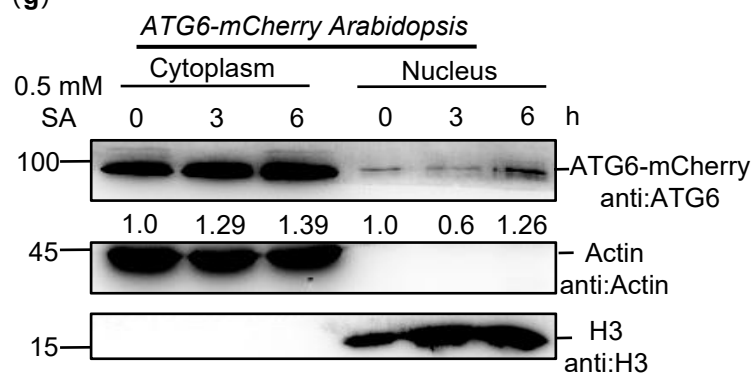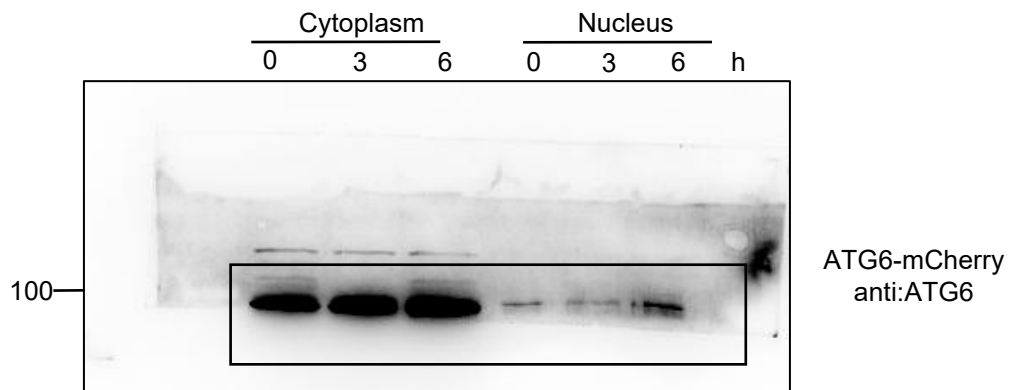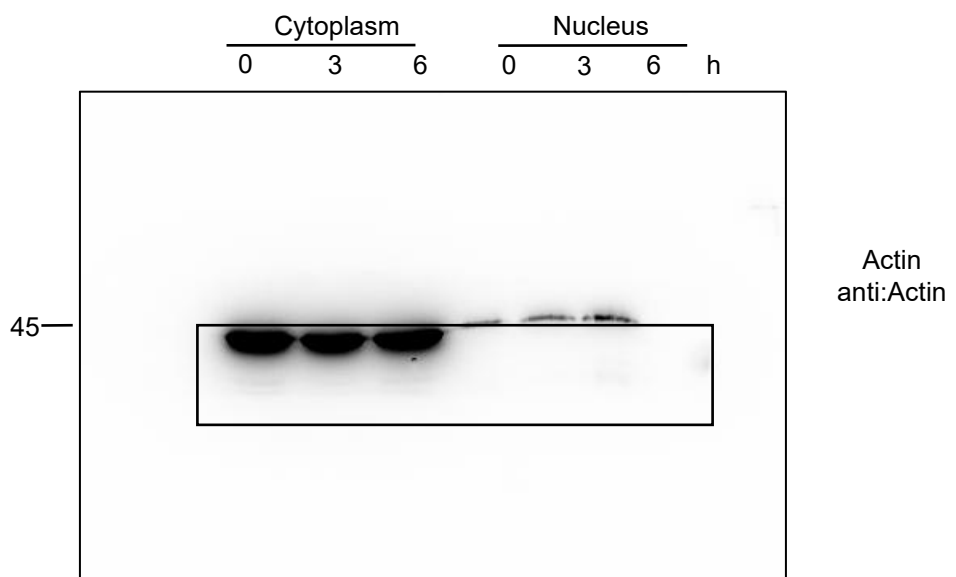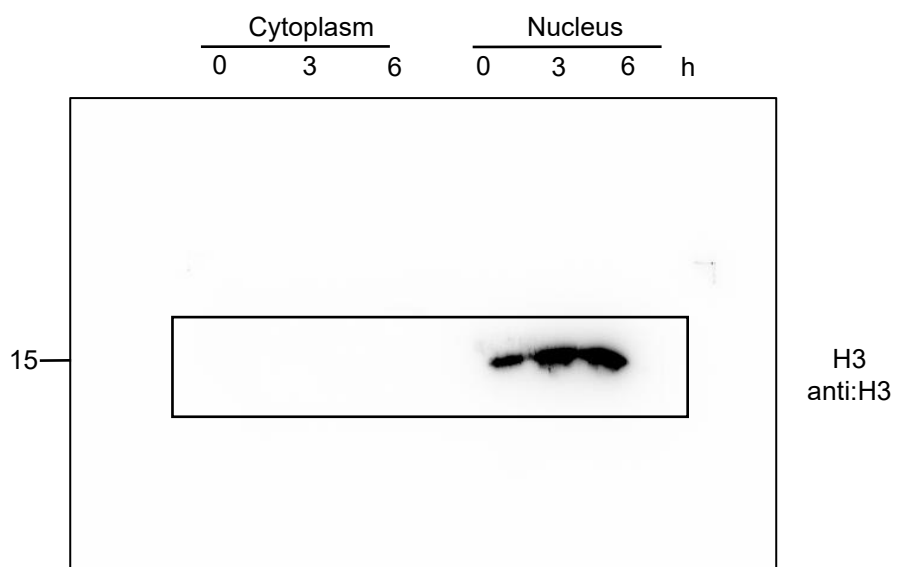

Figure 2. ATG6 is localized in the cytoplasm and nucleus

Supplement: fig2-data2 [file elife-97206-fig2-data2-v1.zip]

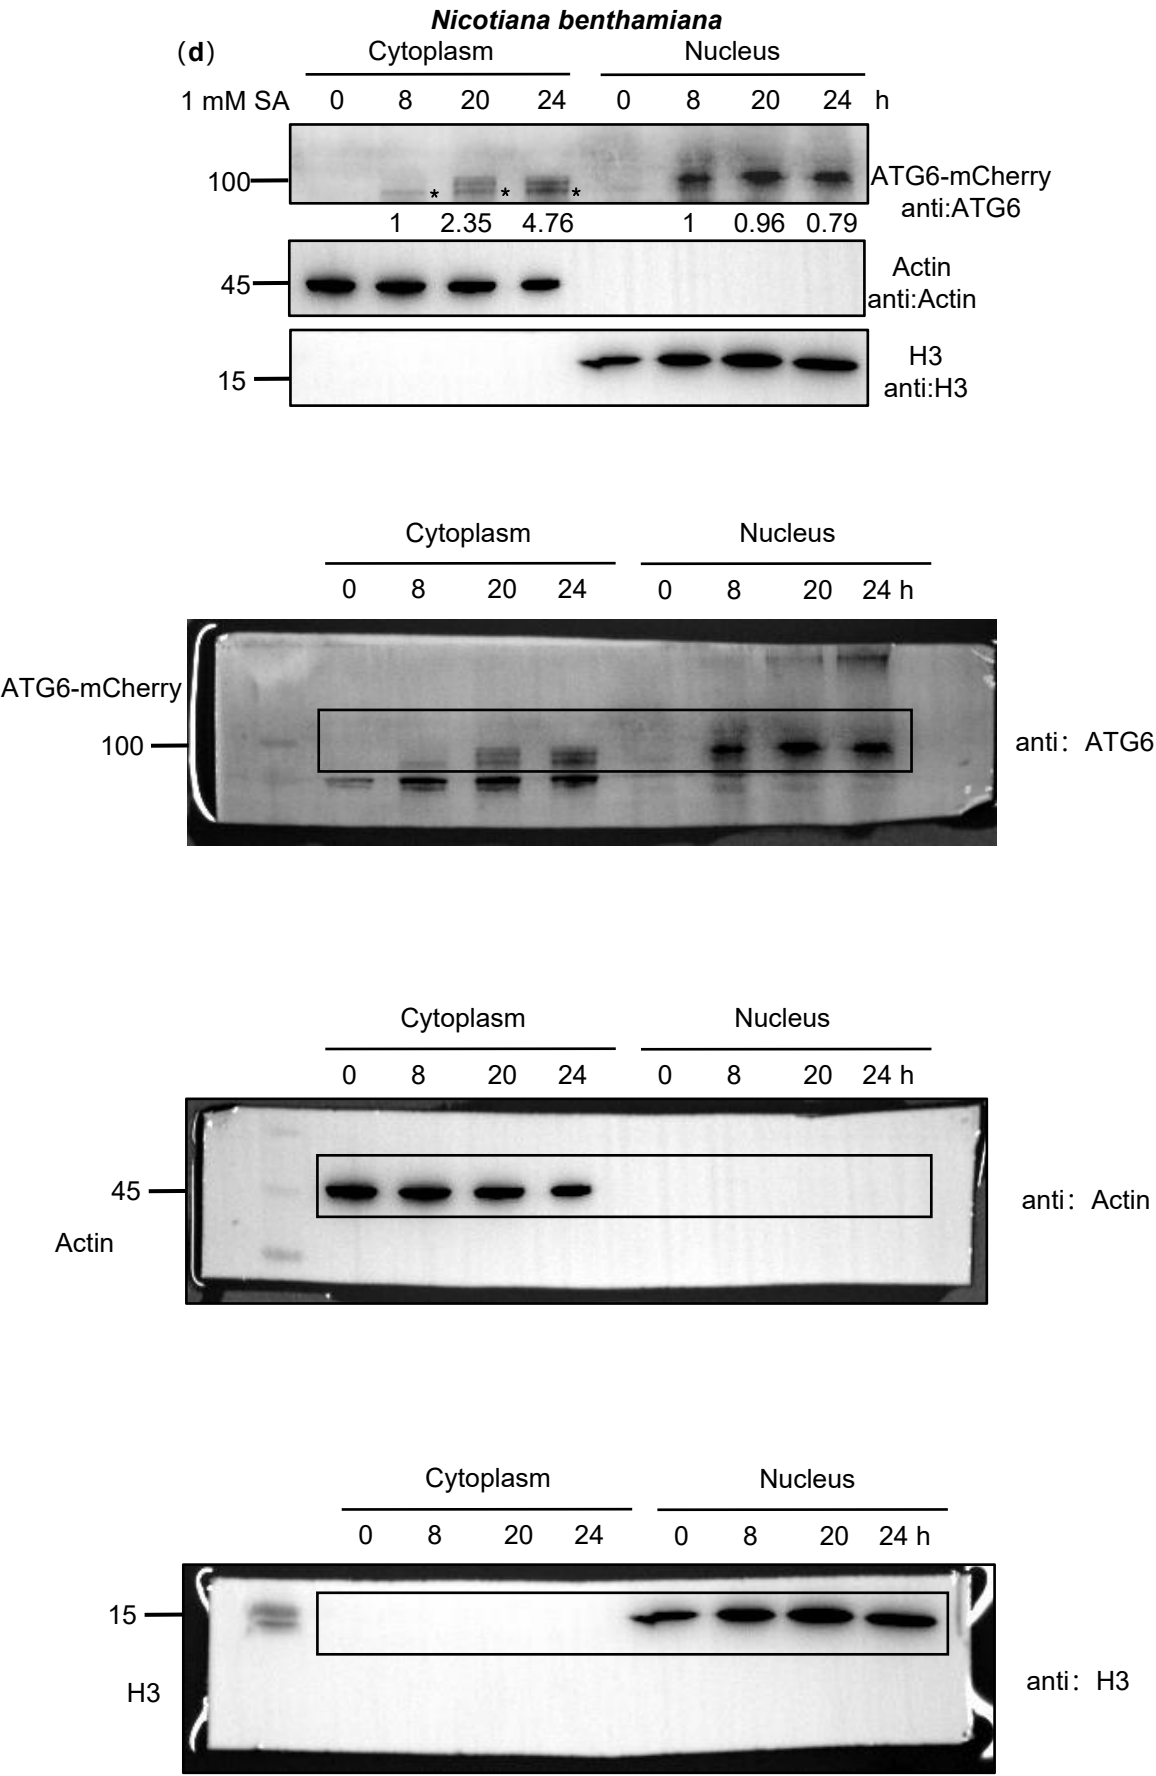

**Figure 2. ATG6 is localized in the cytoplasm and nucleus**

Supplement: fig2-data2 [file elife-97206-fig2-data2-v1.zip]

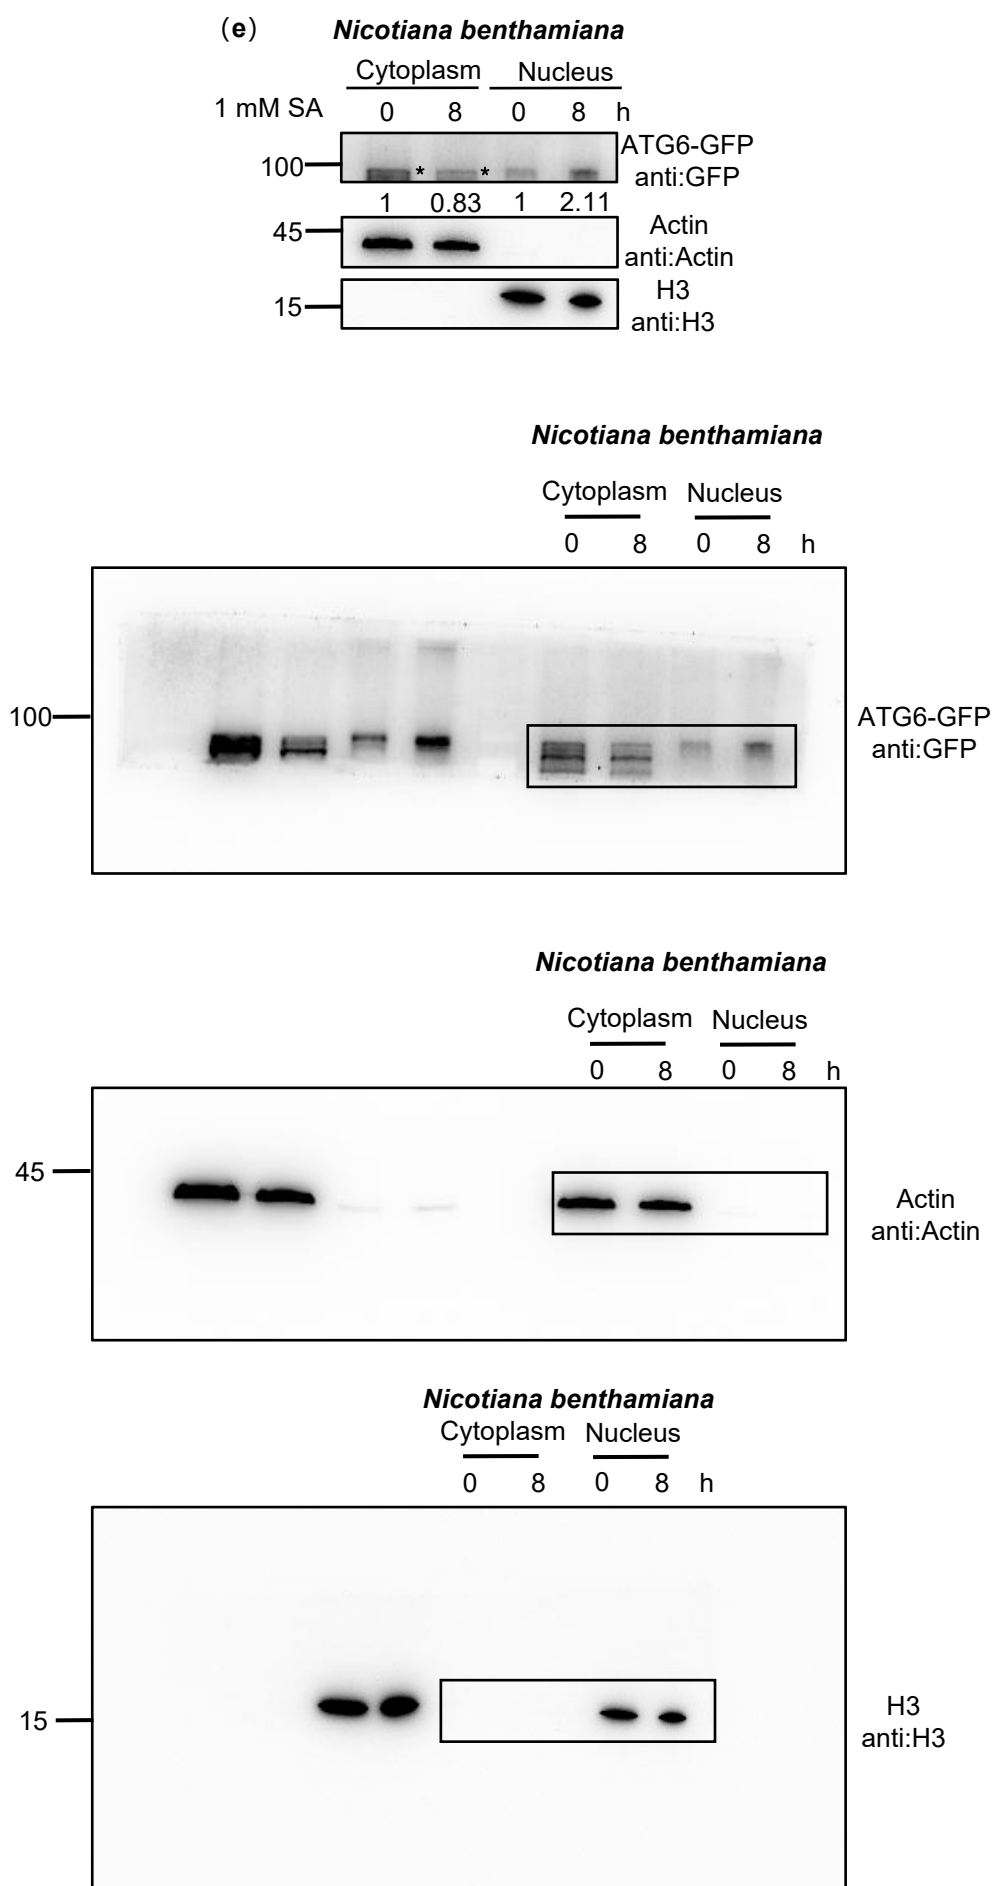

Figure 2. ATG6 is localized in the cytoplasm and nucleus

Supplement: fig2-data2 [file elife-97206-fig2-data2-v1.zip]

(e)

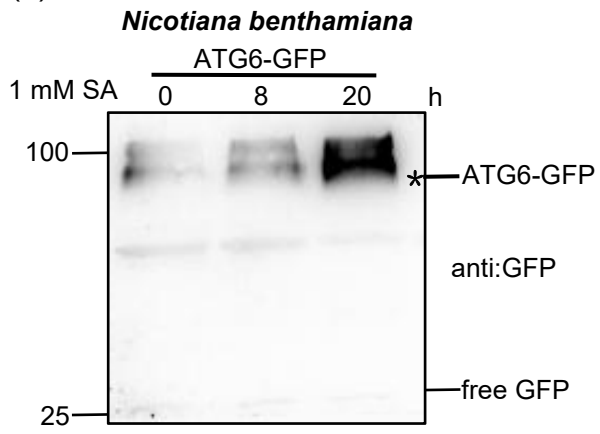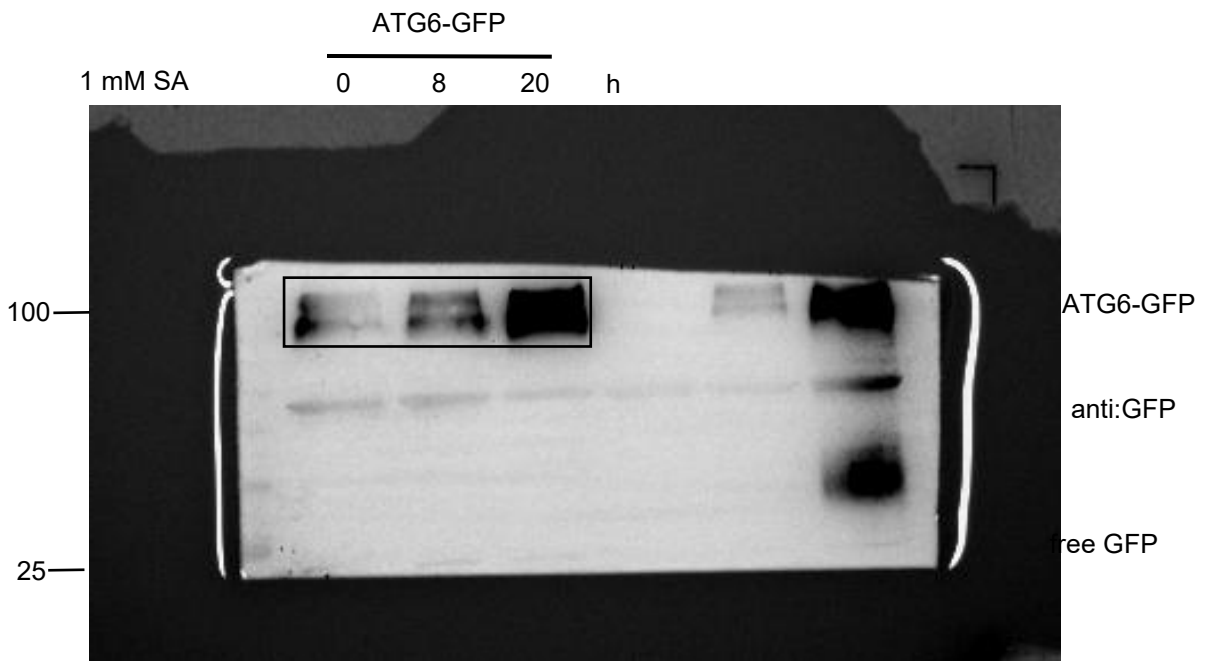

Figure 2-figure supplement 1 e The nuclear localization of ATG6 in *Arabidopsis*.

Supplement: fig2-figsupp1-data2 [file elife-97206-fig2-figsupp1-data2-v1.zip]

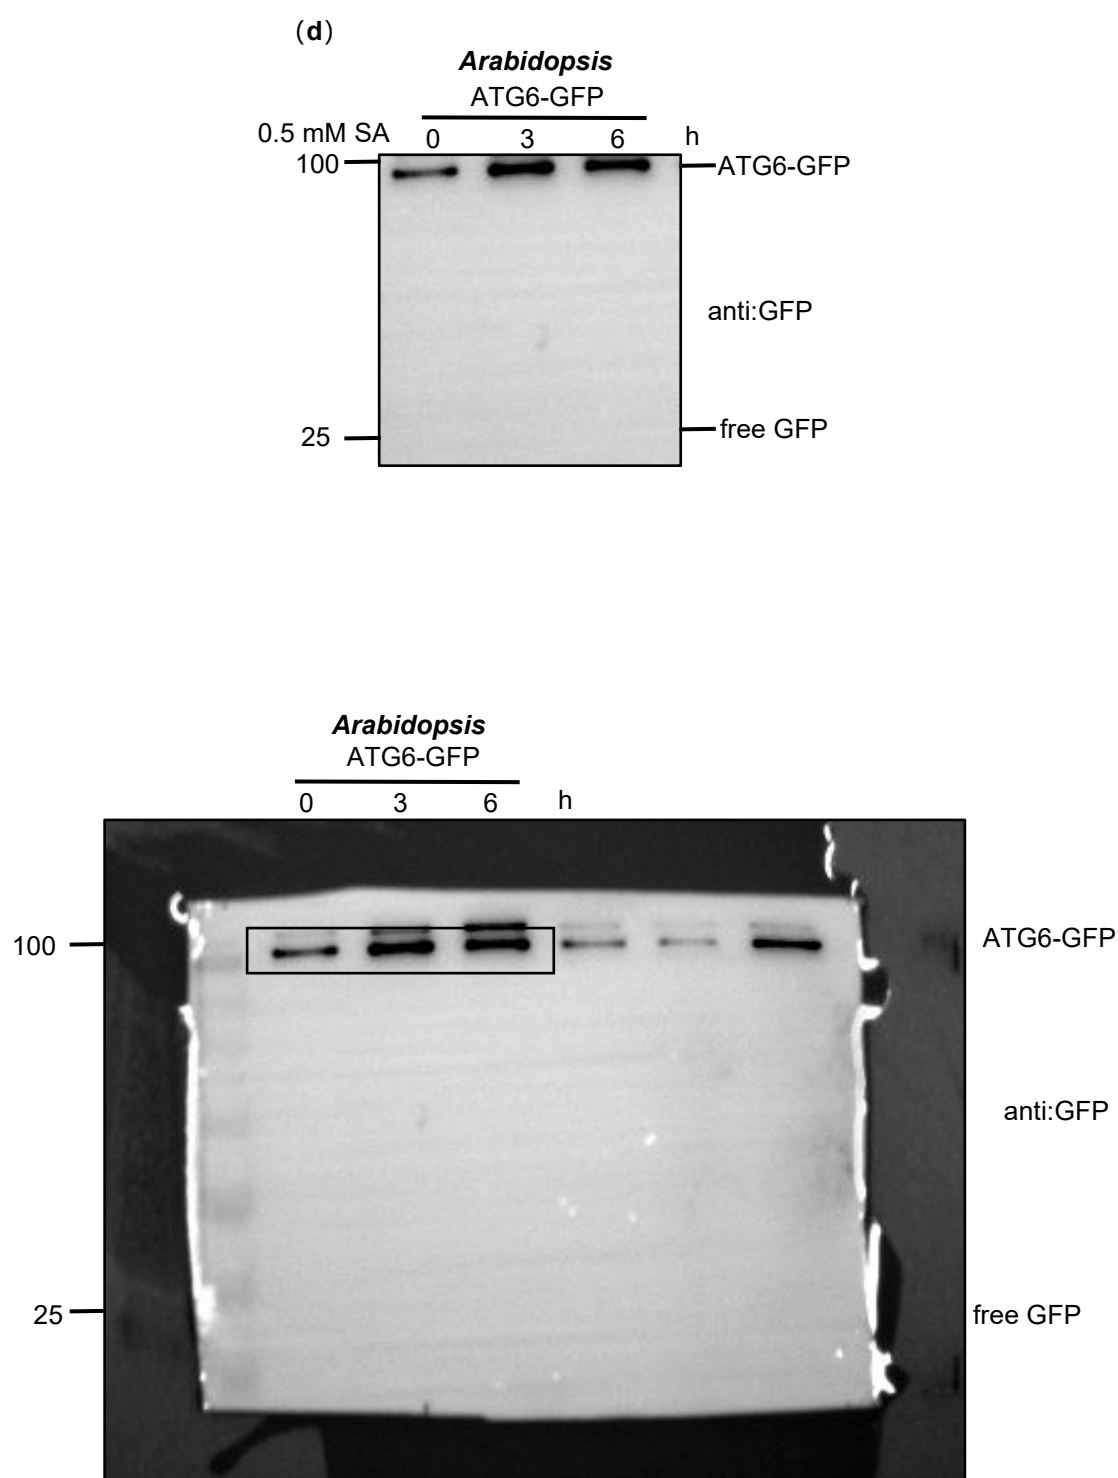

Figure 2-figure supplement 1-source data 2 The nuclear localization of ATG6 in *Arabidopsis*.

Supplement: fig2-figsupp1-data2 [file elife-97206-fig2-figsupp1-data2-v1.zip]

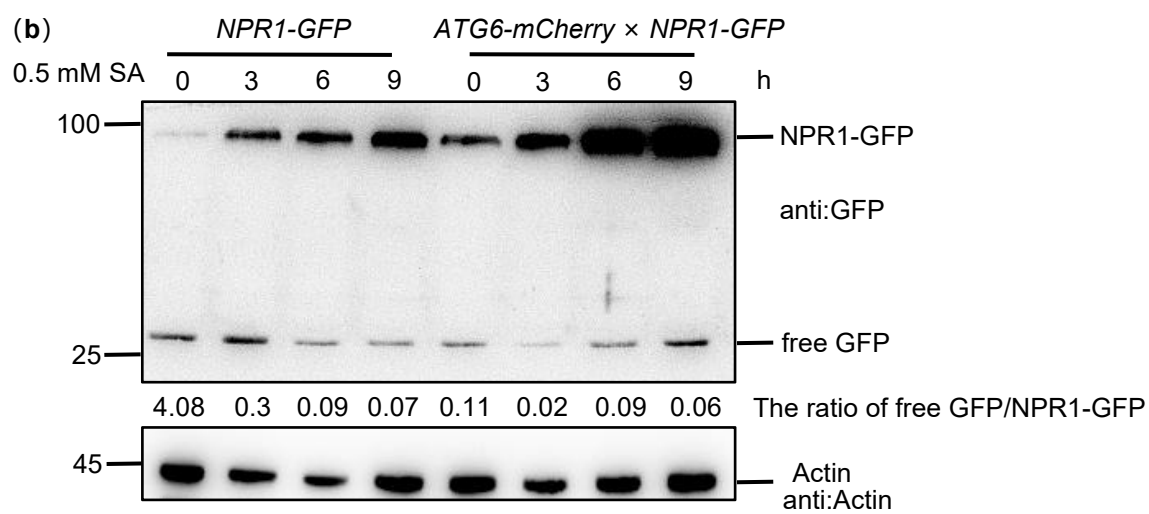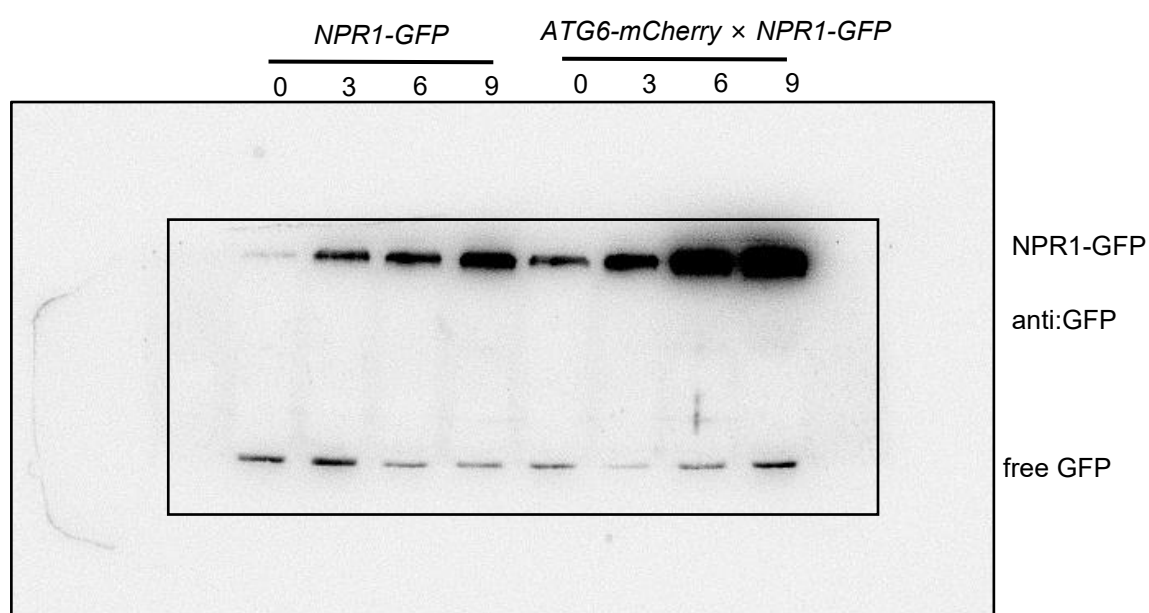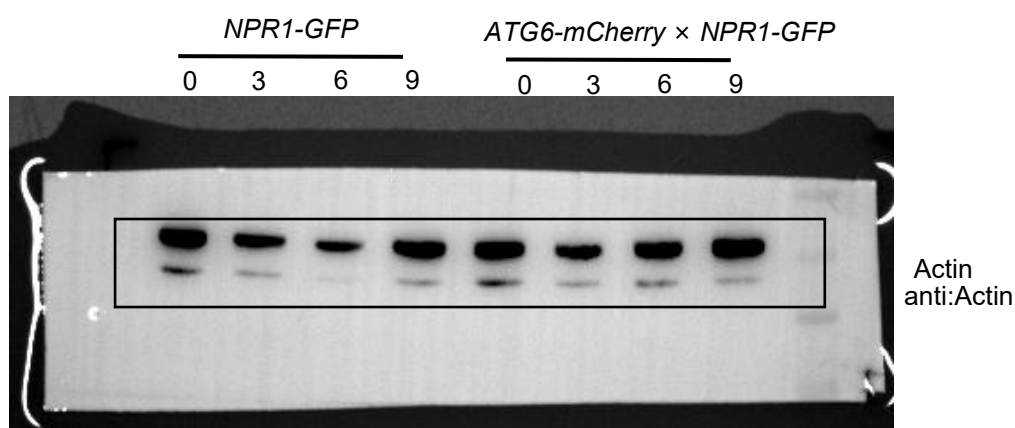

Figure 2-figure supplement 2 Identification of *ATG6-mCherry* × *NPR1-GFP* plants.

Supplement: fig2-figsupp2-data2 [file elife-97206-fig2-figsupp2-data2-v1.zip]

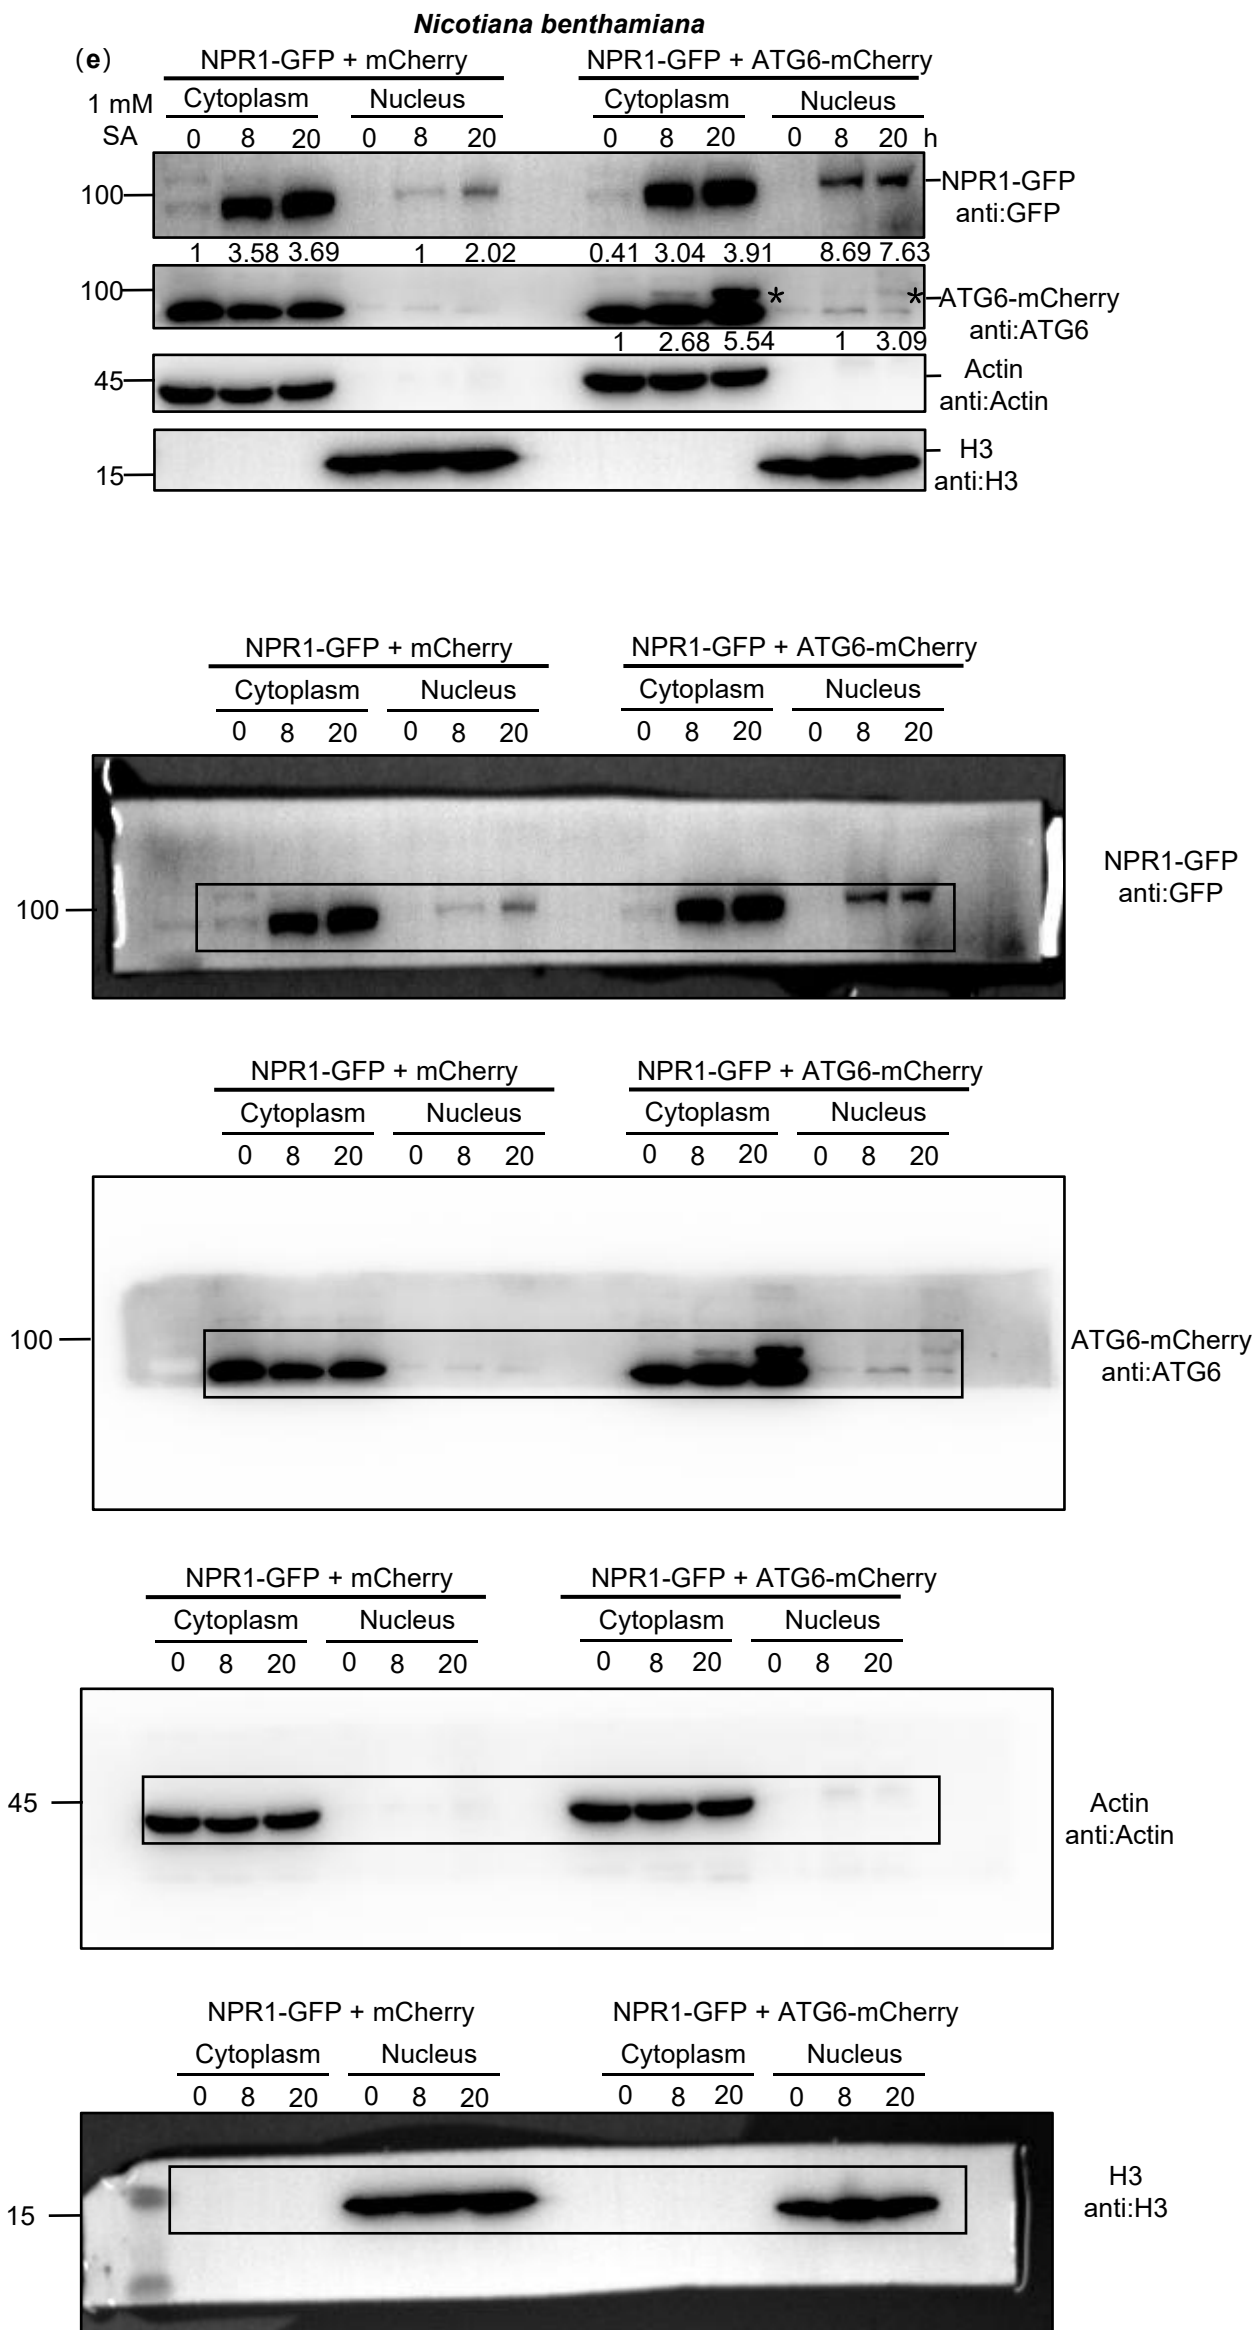

**Figure 3. ATG6 increases the nuclear accumulation of NPR1 under SA treatment.**

Supplement: fig3-data2 [file elife-97206-fig3-data2-v1.zip]

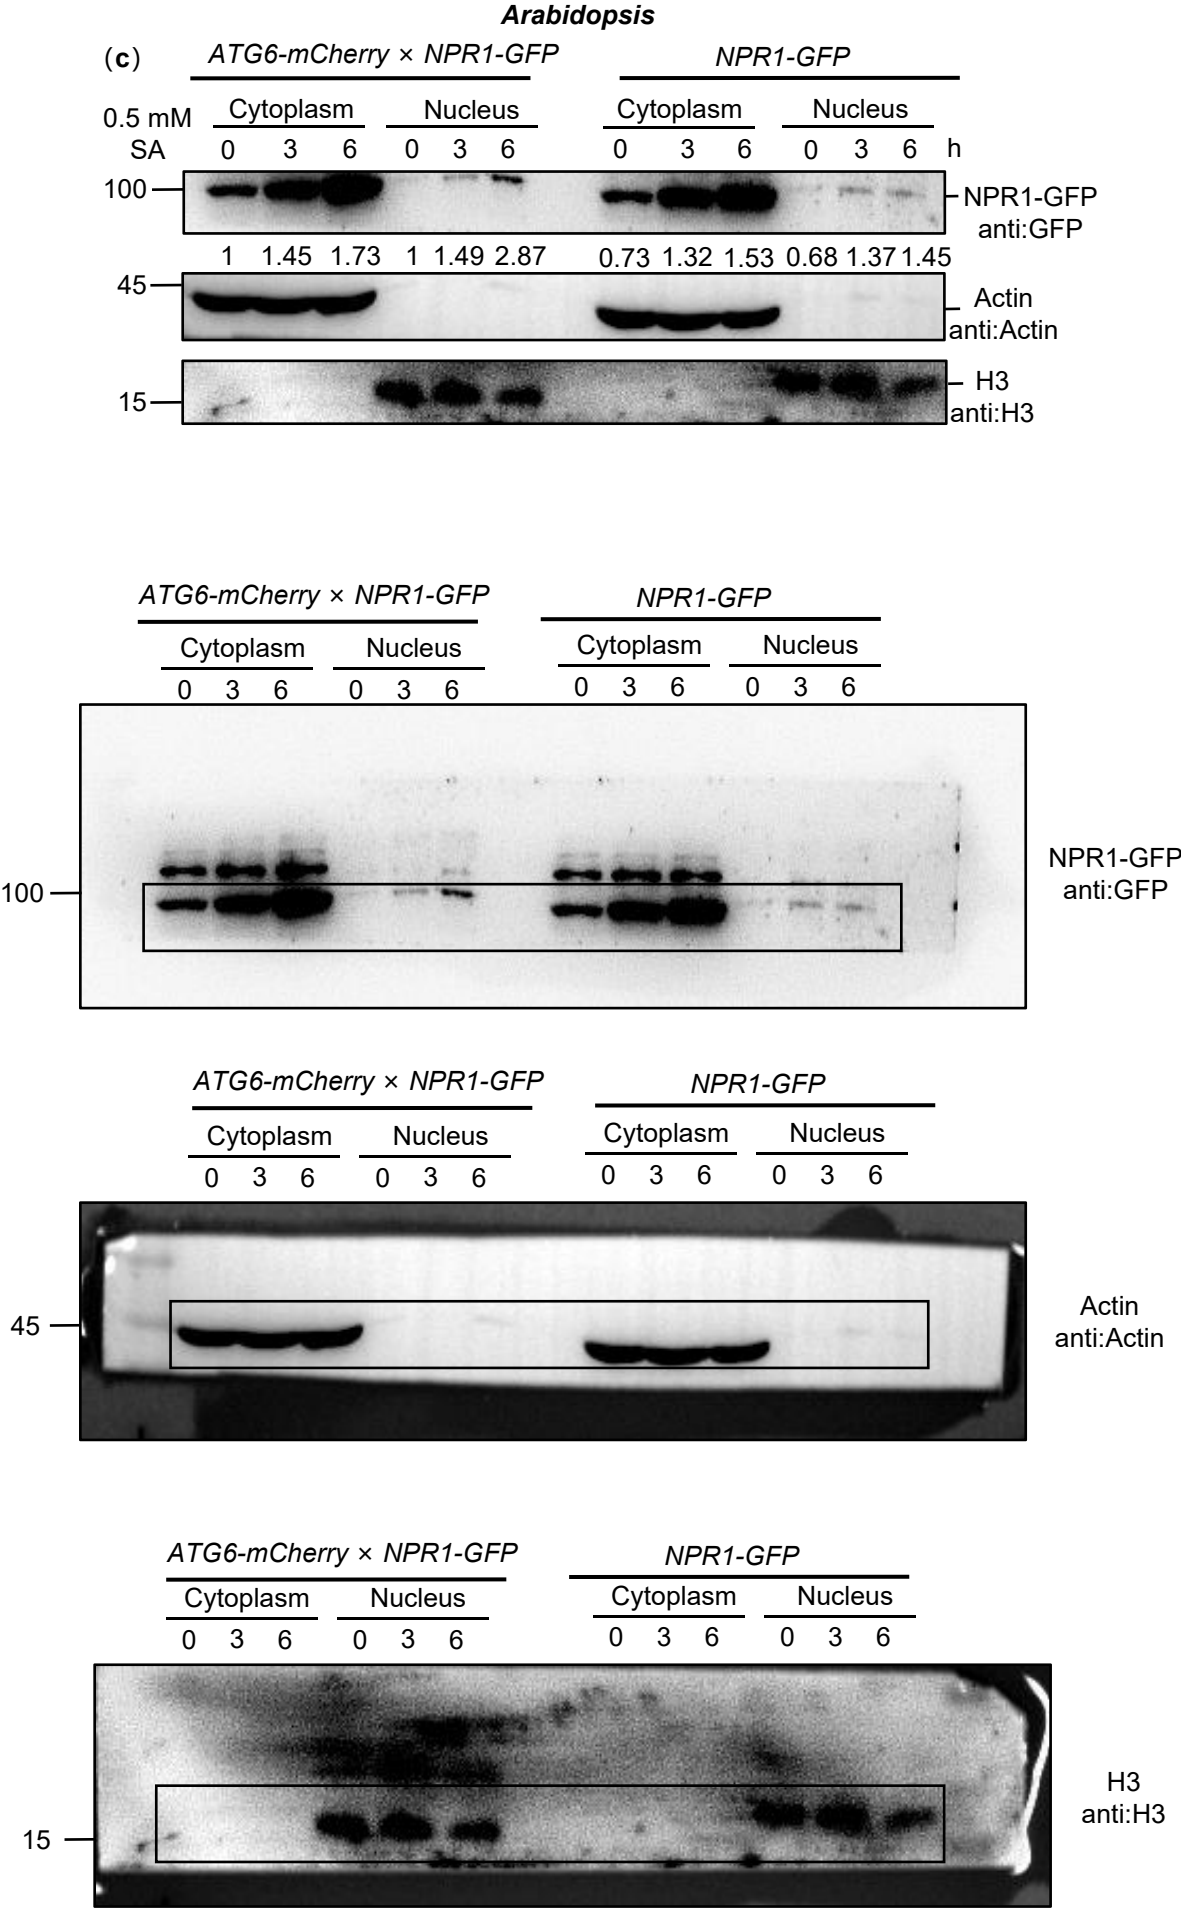

Figure 3. ATG6 increases the nuclear accumulation of NPR1 under SA treatment.

Supplement: fig3-data2 [file elife-97206-fig3-data2-v1.zip]

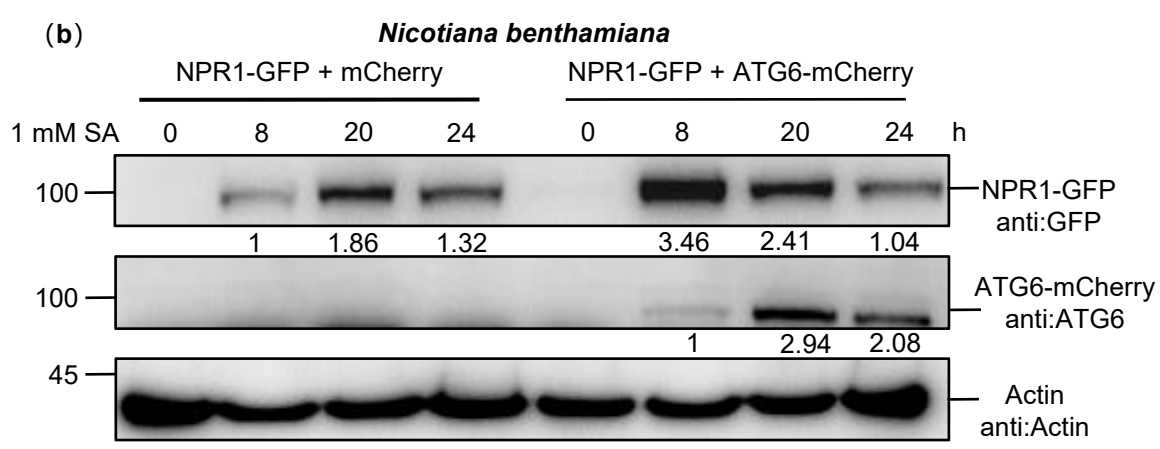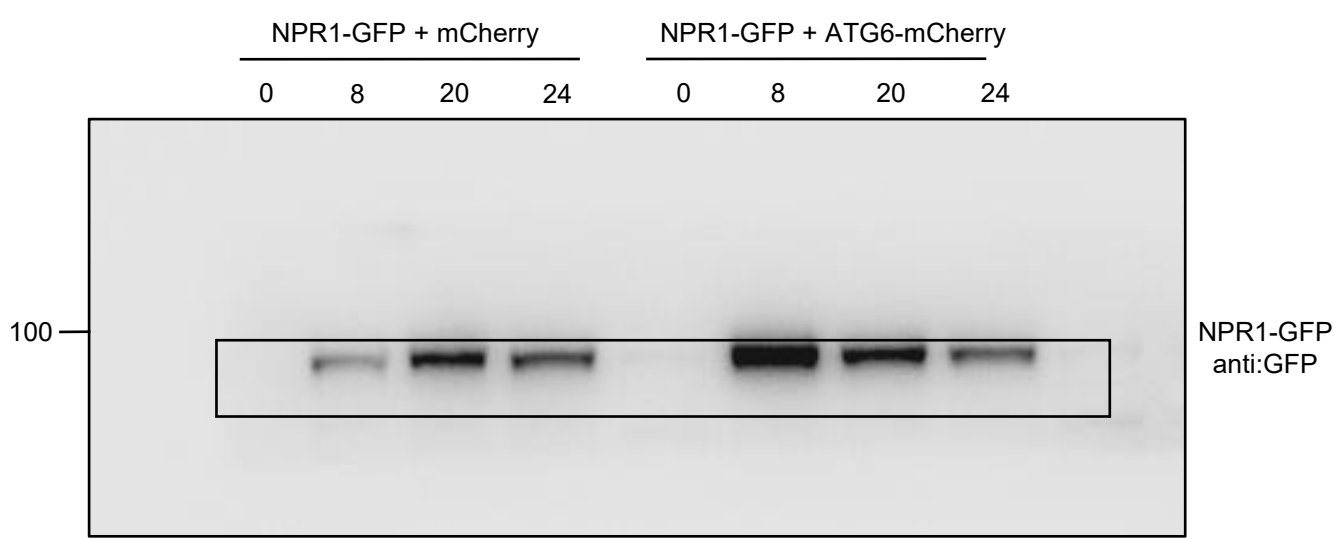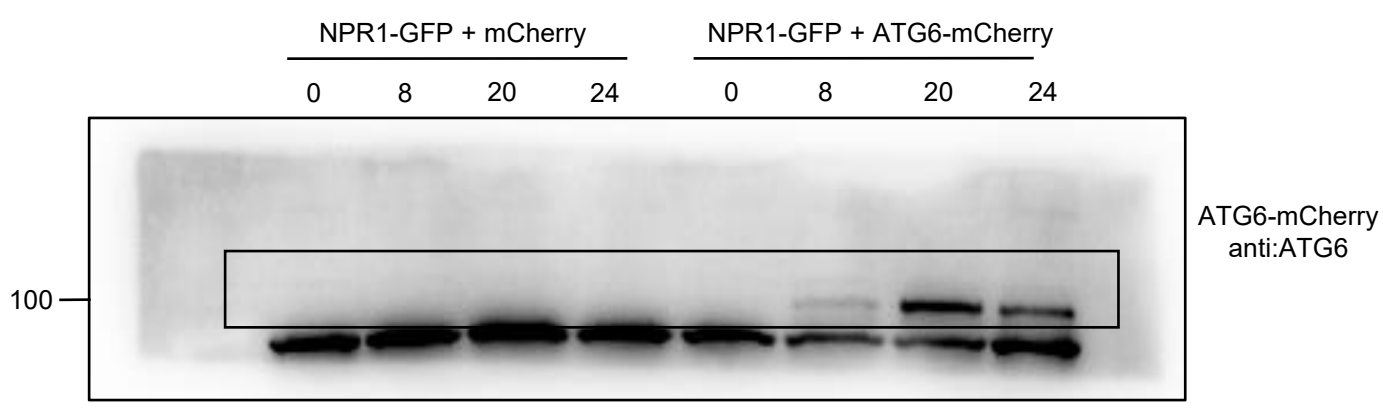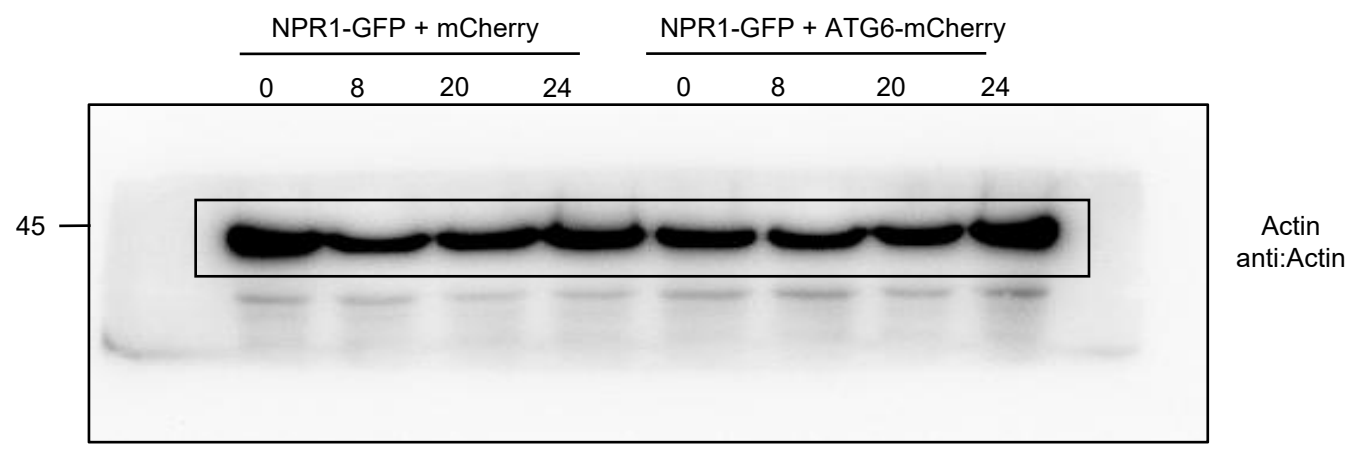

Figure 5. ATG6 increases the NPR1 protein levels and the formation of SINC-like condensates.

Supplement: fig5-data2 [file elife-97206-fig5-data2-v1.zip]

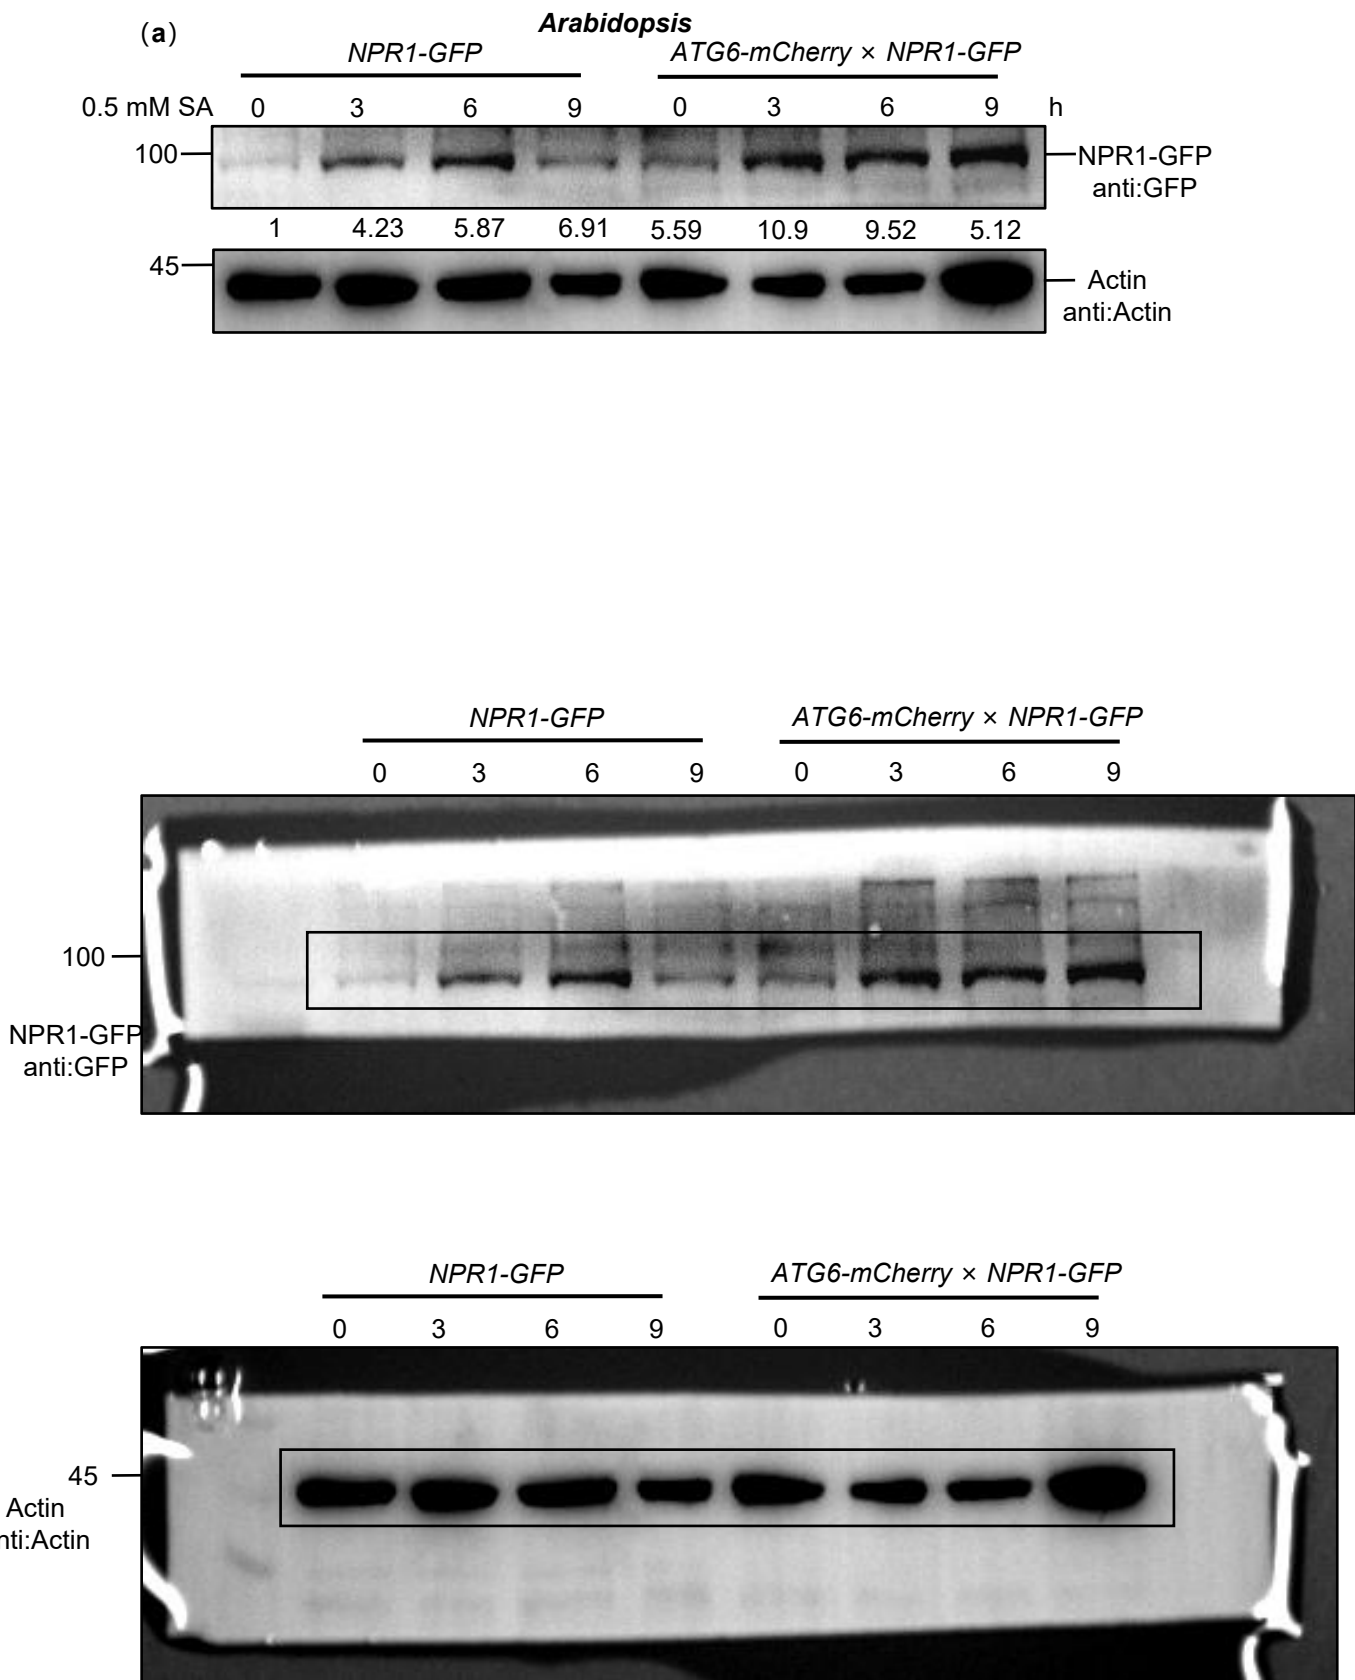

Figure 5. ATG6 increases the NPR1 protein levels and the formation of SINC-like condensates.

Supplement: fig5-data2 [file elife-97206-fig5-data2-v1.zip]

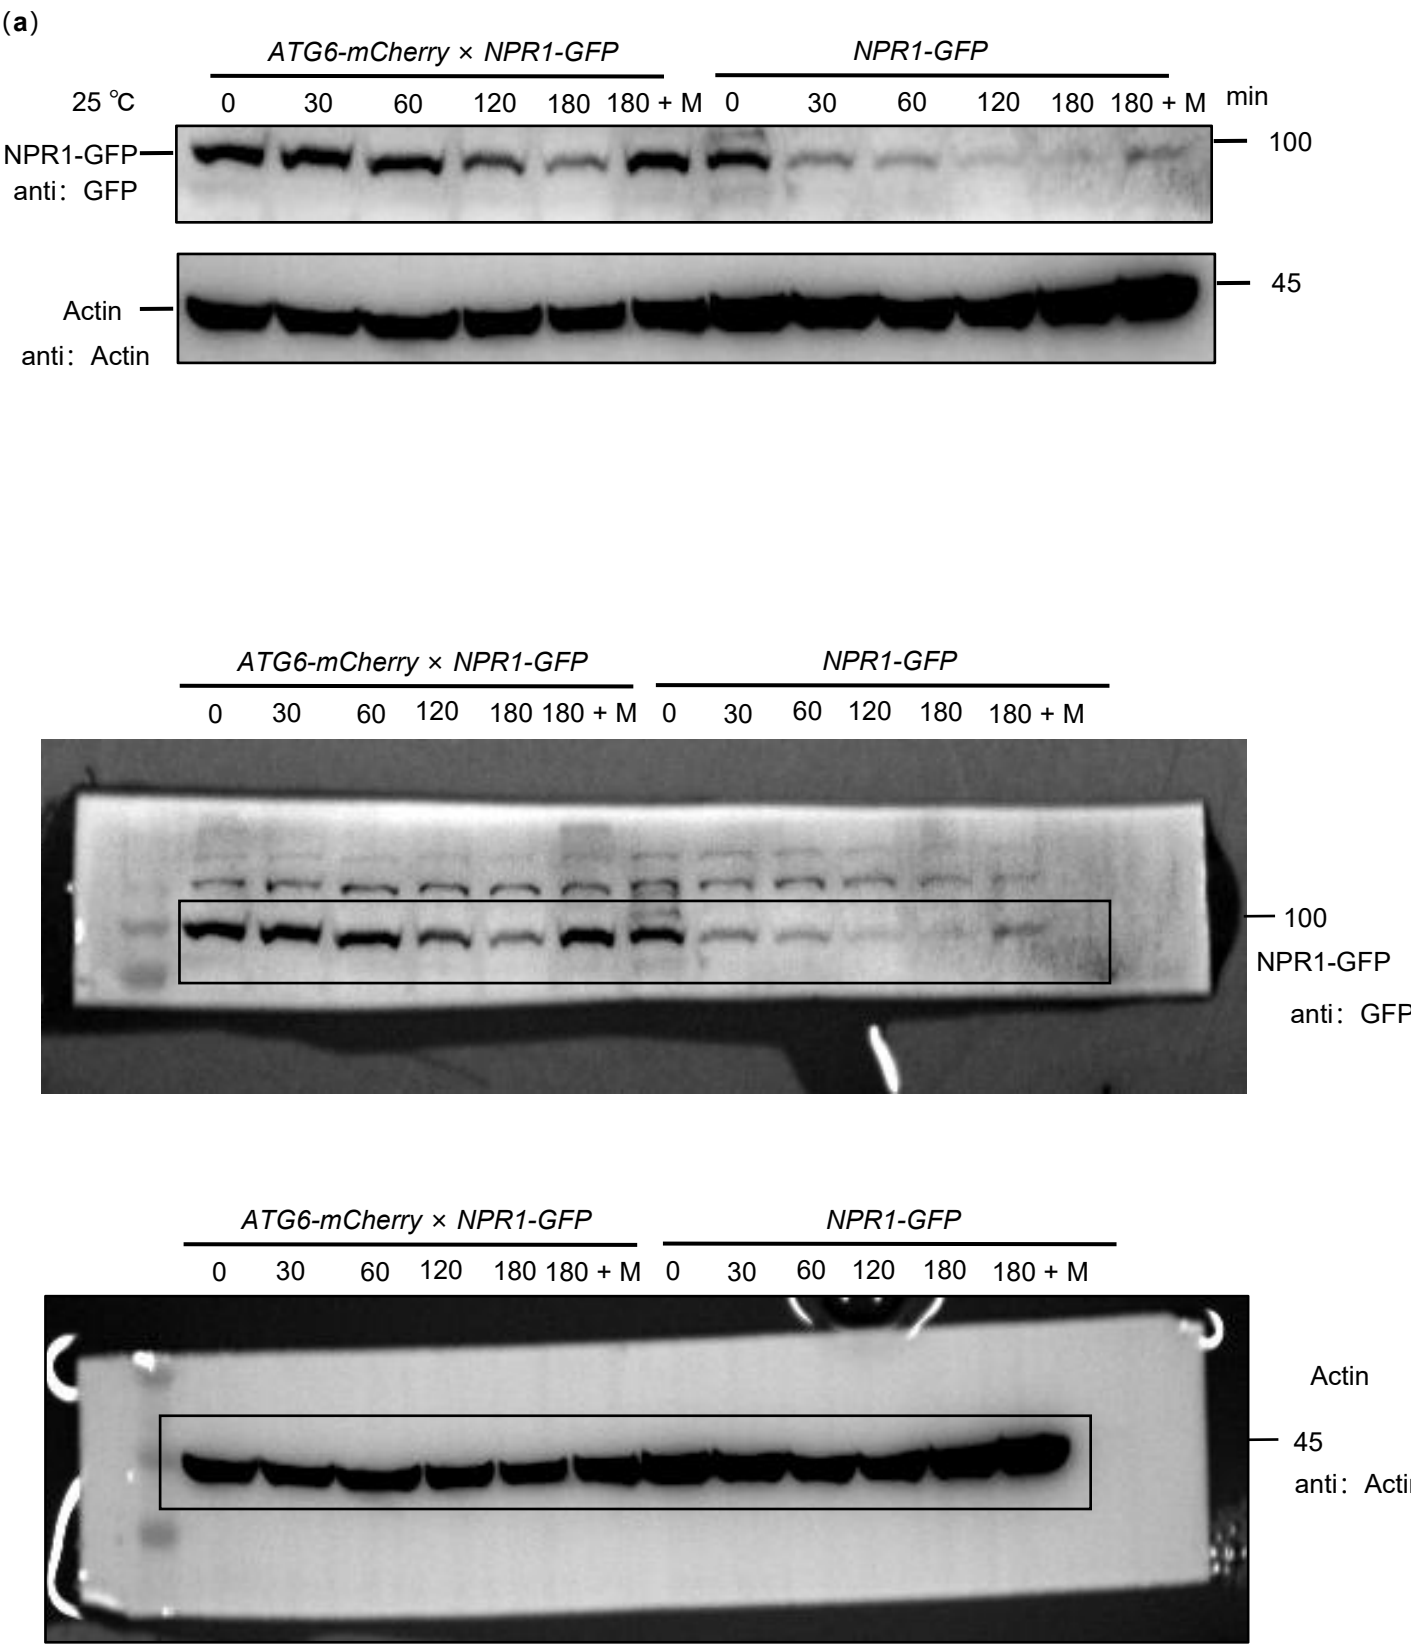

Figure 6. ATG6 improves the protein stability of NPR1.

Supplement: fig6-data2 [file elife-97206-fig6-data2-v1.zip]

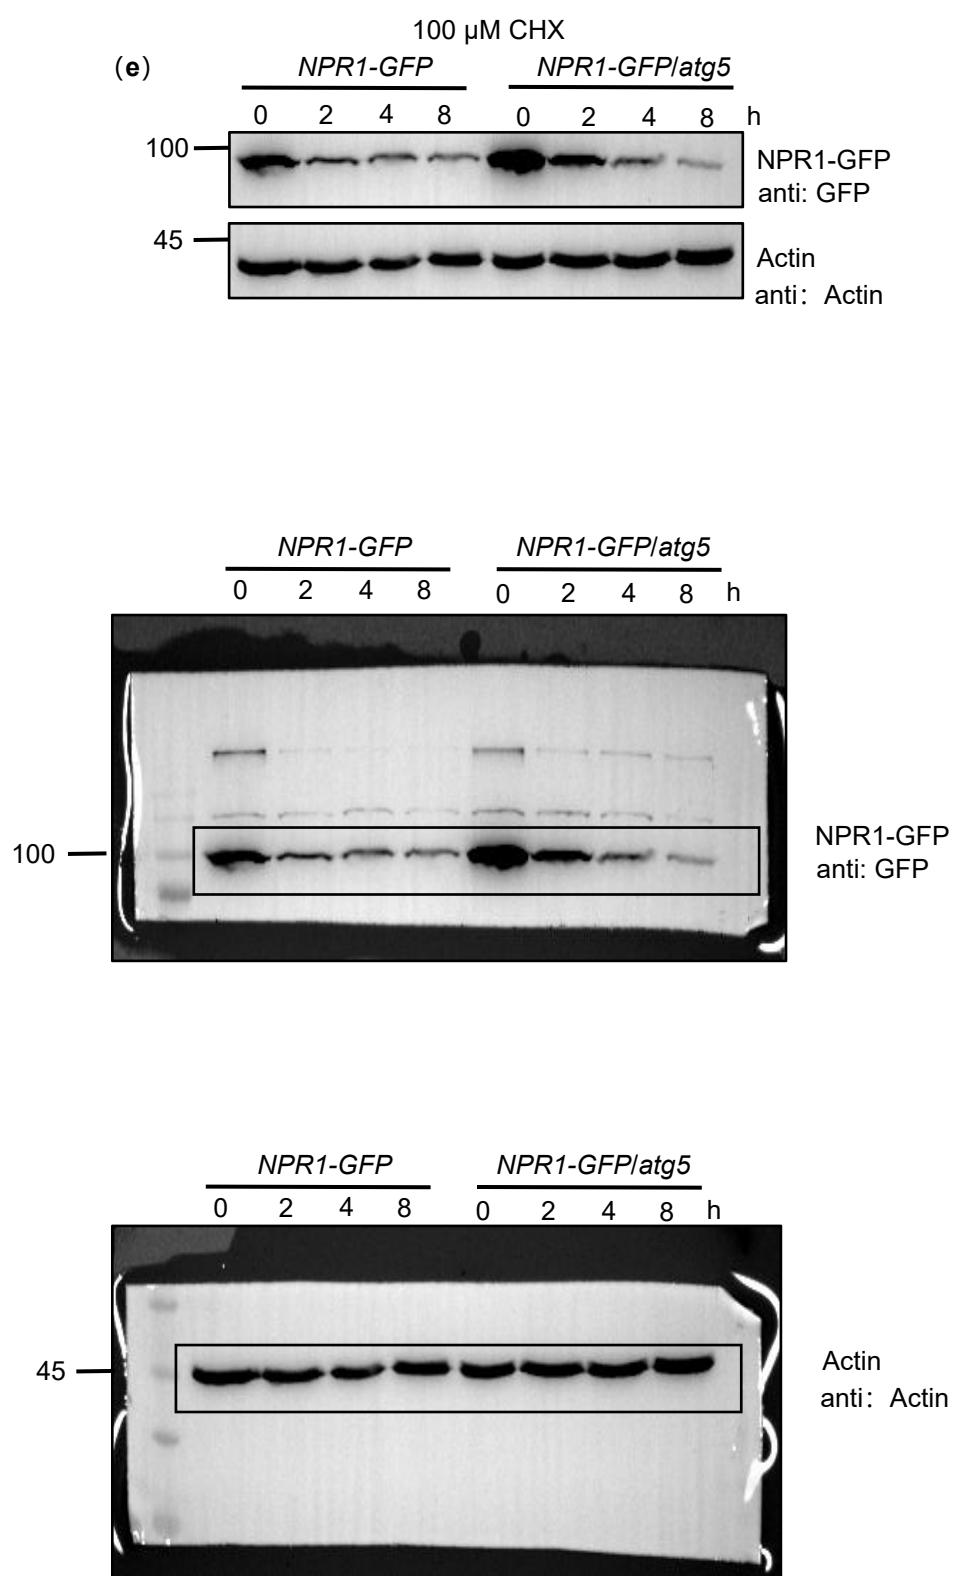

Figure 6. ATG6 improves the protein stability of NPR1.

Supplement: fig6-data2 [file elife-97206-fig6-data2-v1.zip]

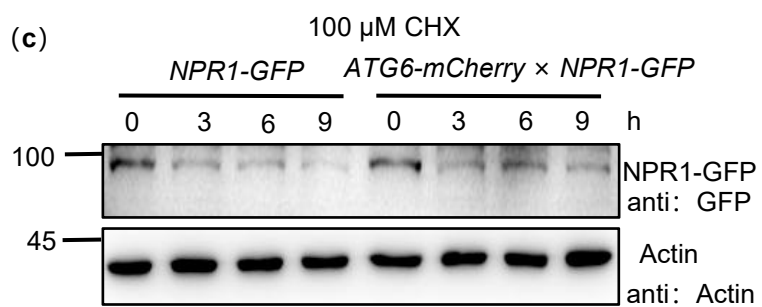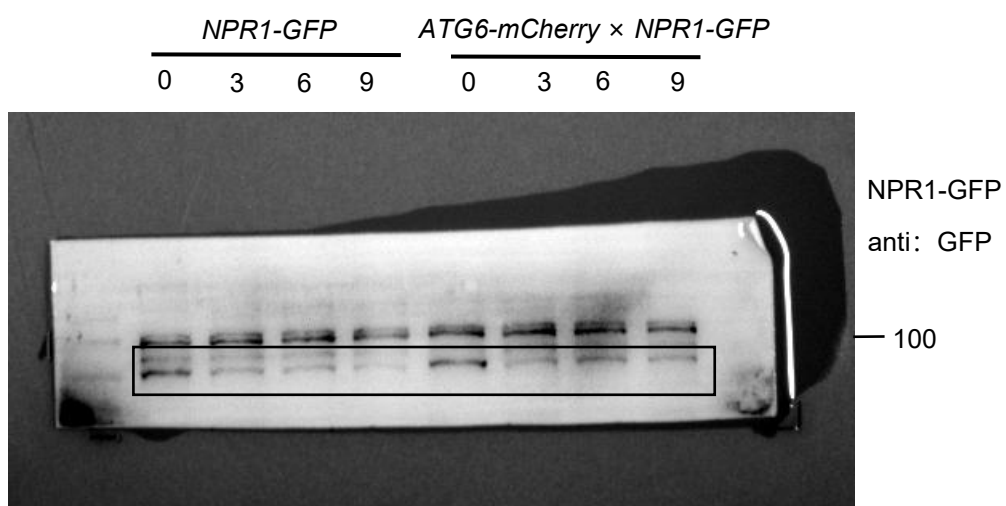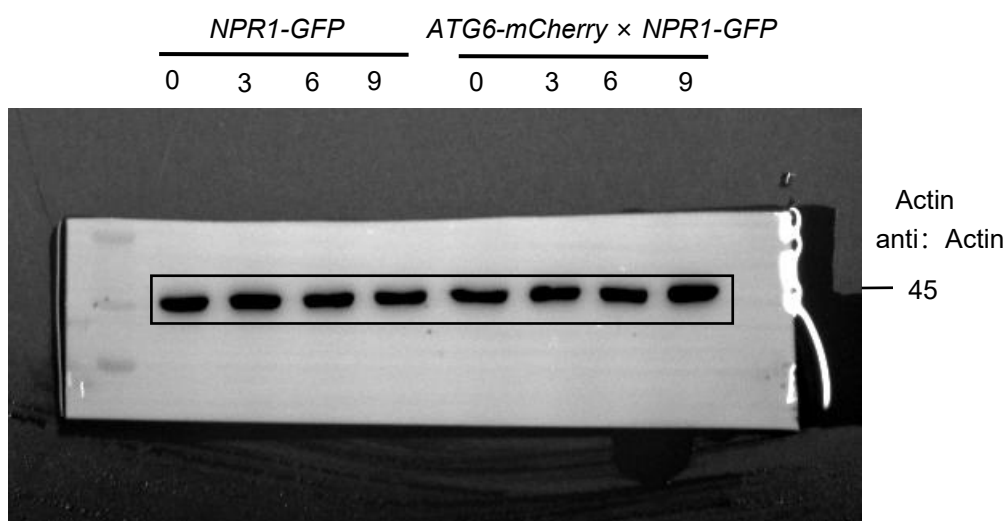

Figure 6. ATG6 improves the protein stability of NPR1.

Supplement: fig6-data2 [file elife-97206-fig6-data2-v1.zip]

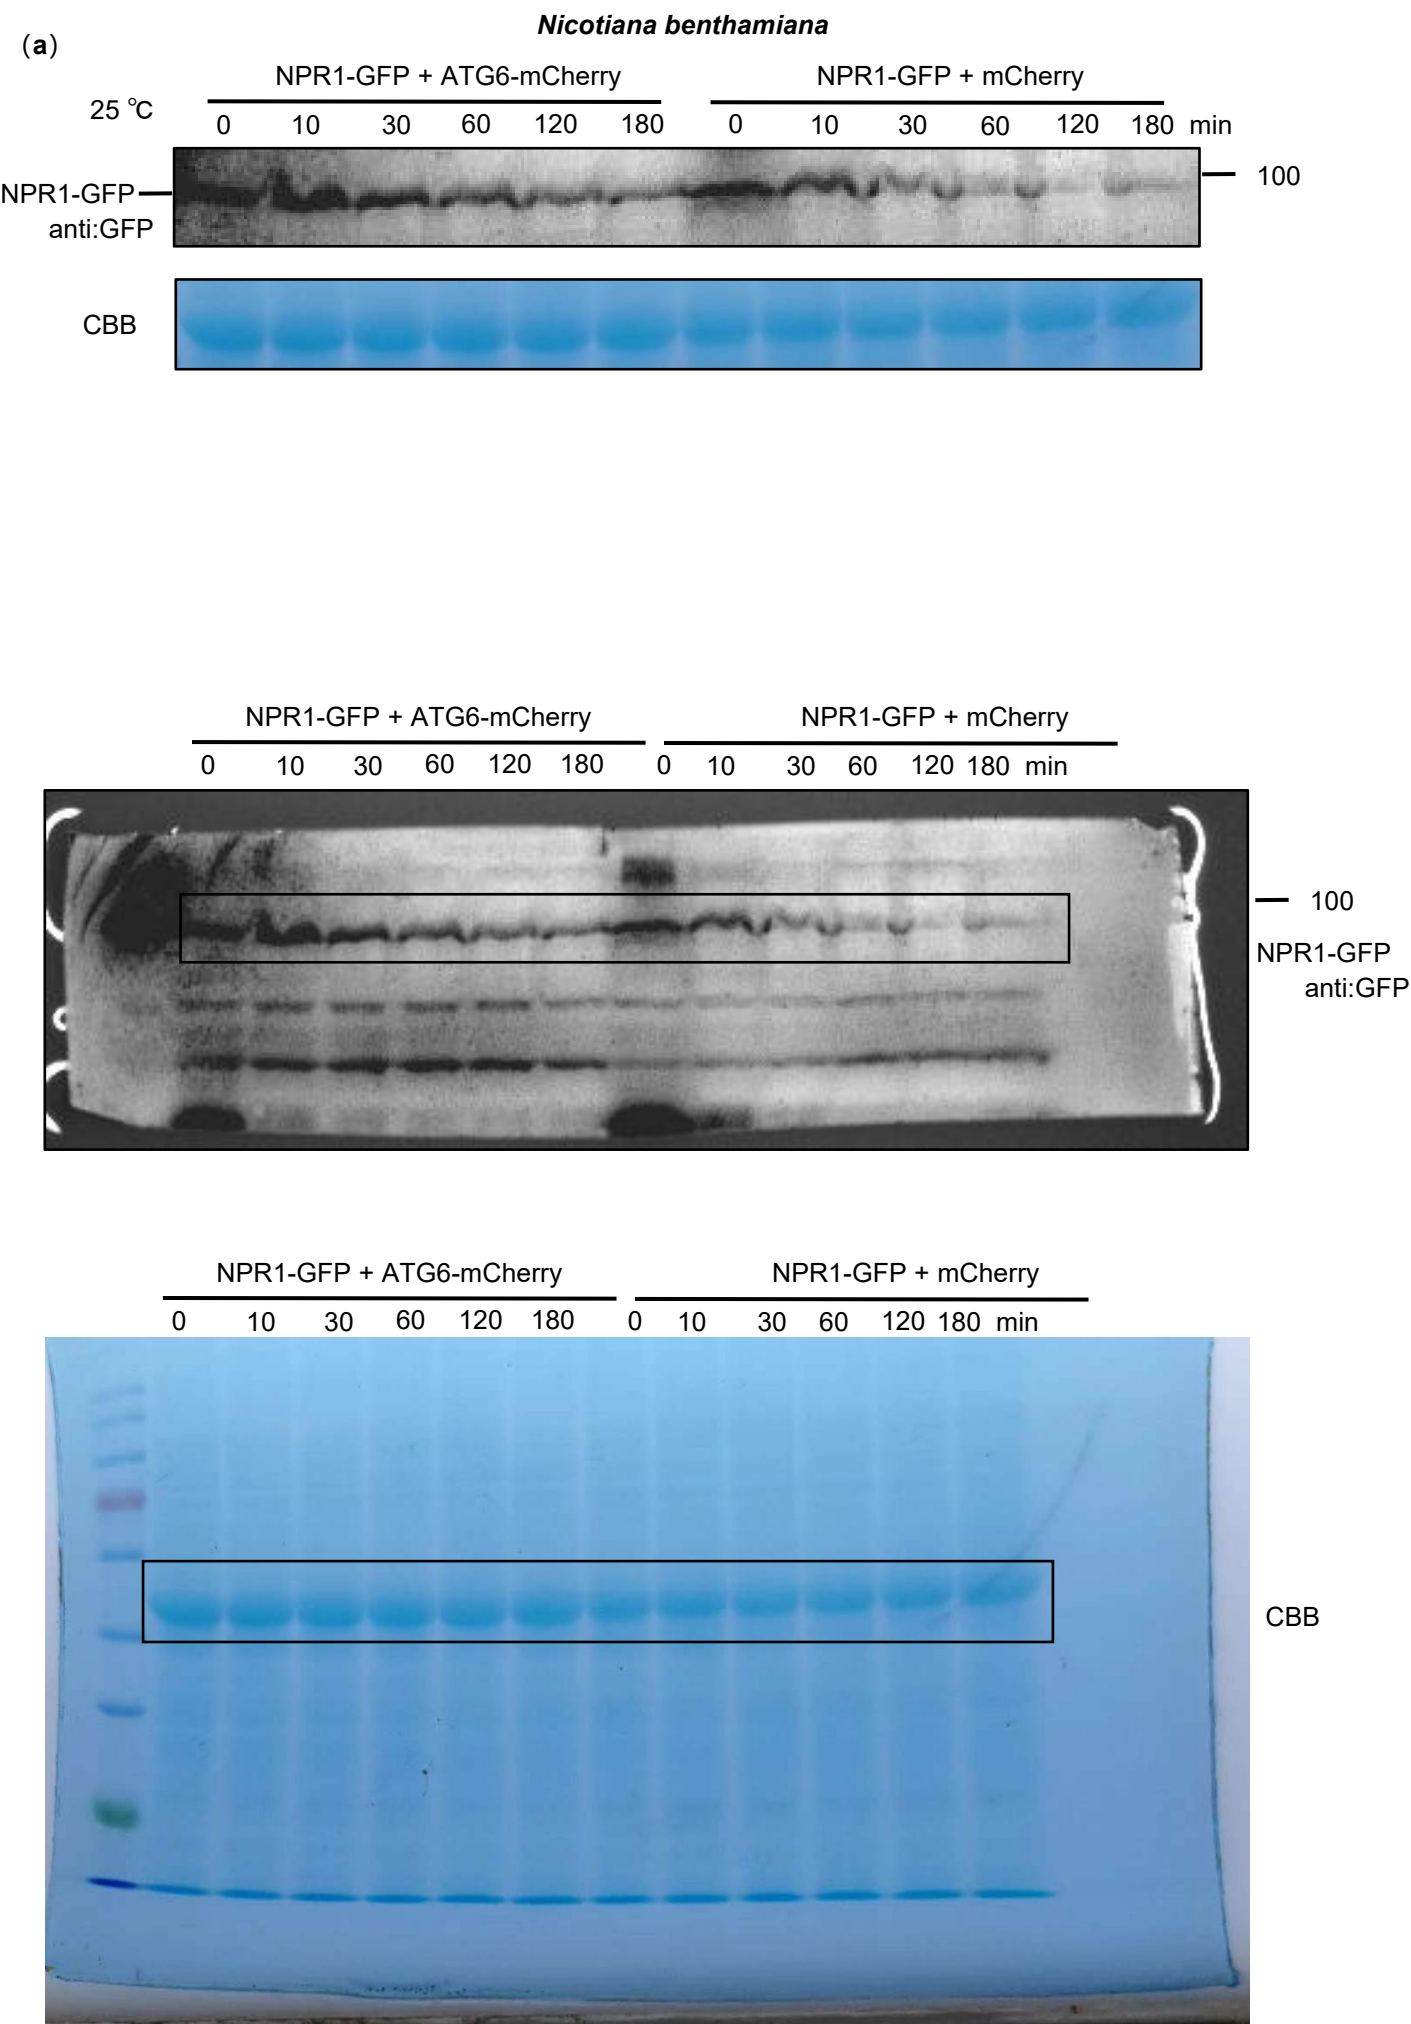

Figure 6-figure supplement 1 ATG6 improves the protein stability of NPR1 in *N. benthamiana*.

Supplement: fig6-figsupp1-data2 [file elife-97206-fig6-figsupp1-data2-v1.zip]

(c)

0.5 mM SA

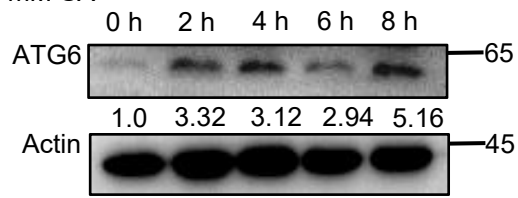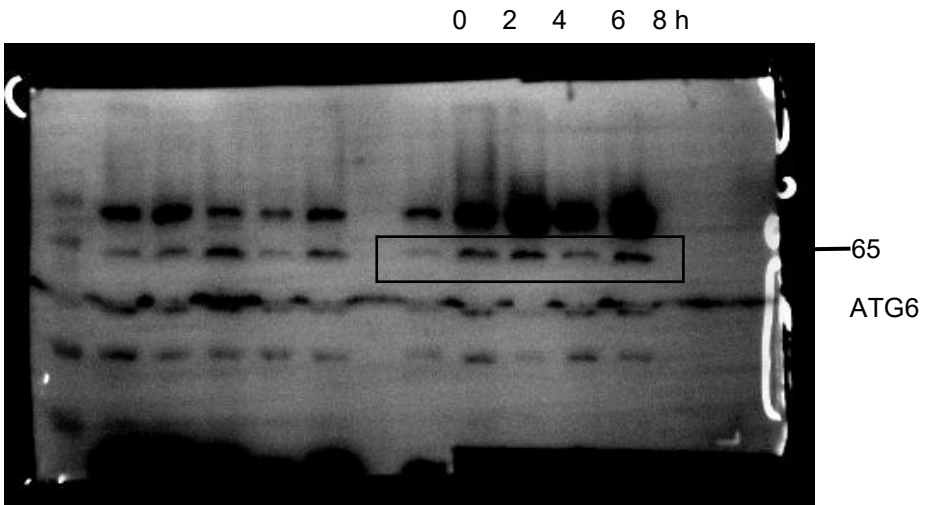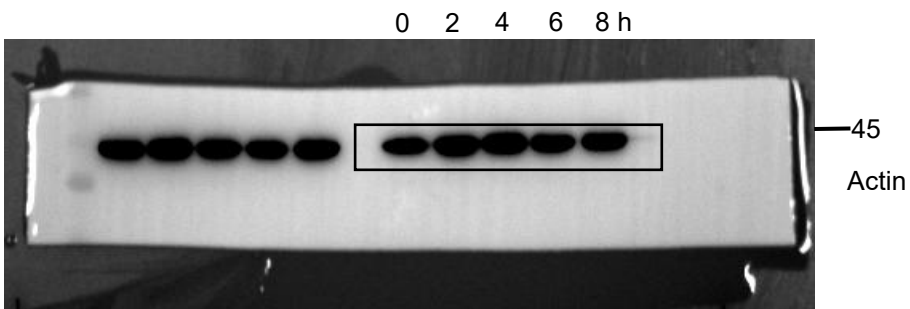

Figure 7. ATG6 and NPR1 jointly inhibit the growth of *Pst* DC3000/*avrRps4*

Supplement: fig7-data2 [file elife-97206-fig7-data2-v1.zip]

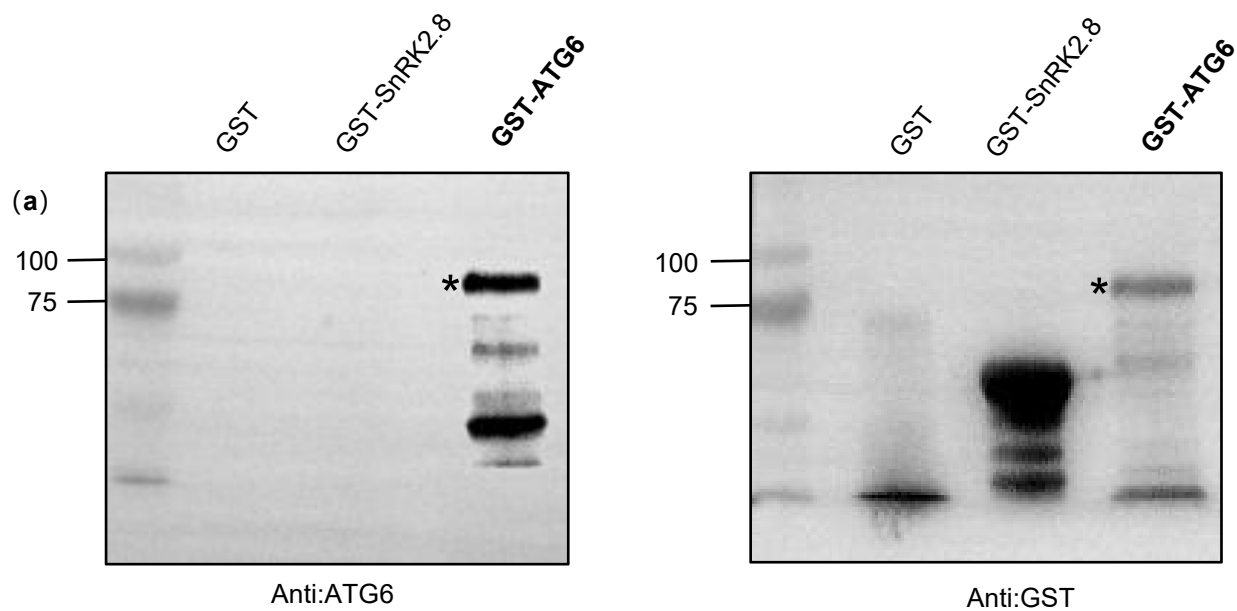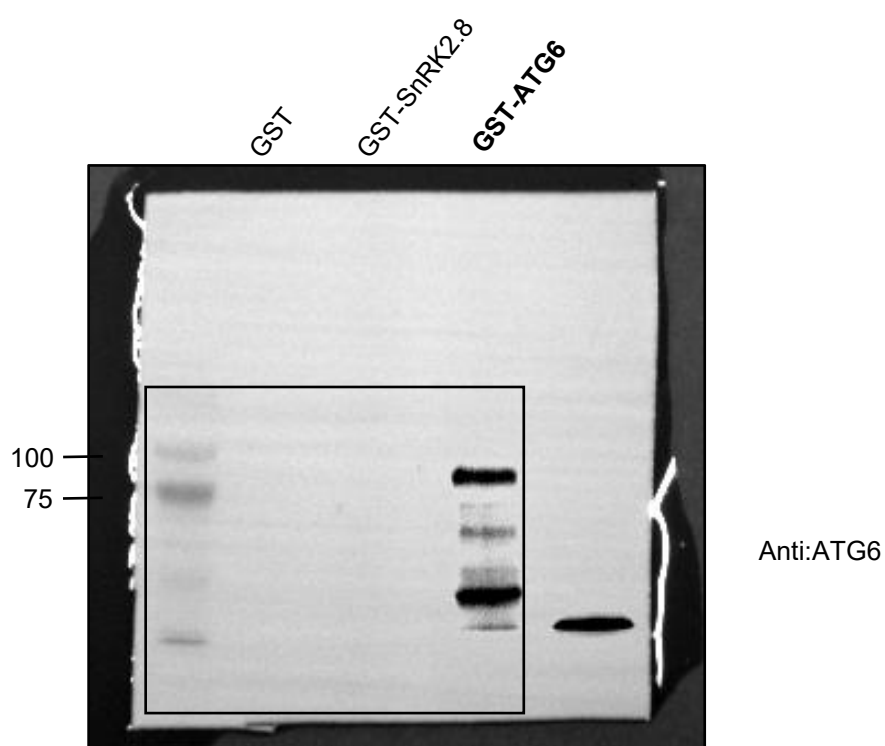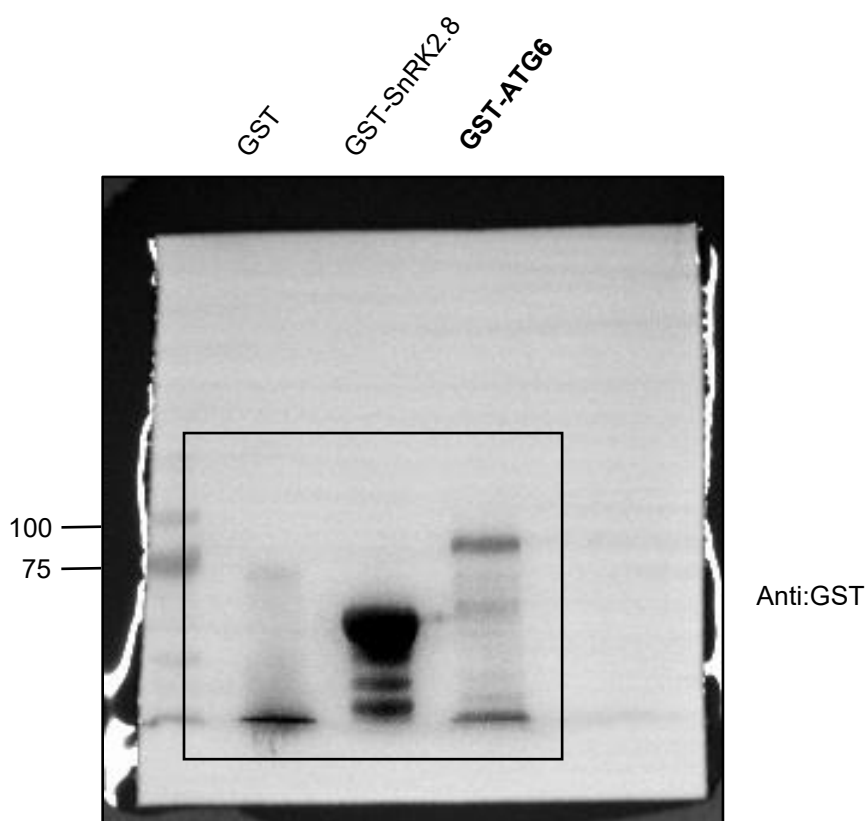

Figure 7-figure supplement 1. Verification of ATG6 antibody specificity.

Supplement: fig7-figsupp1-data2 [file elife-97206-fig7-figsupp1-data2-v1.zip]

(b)

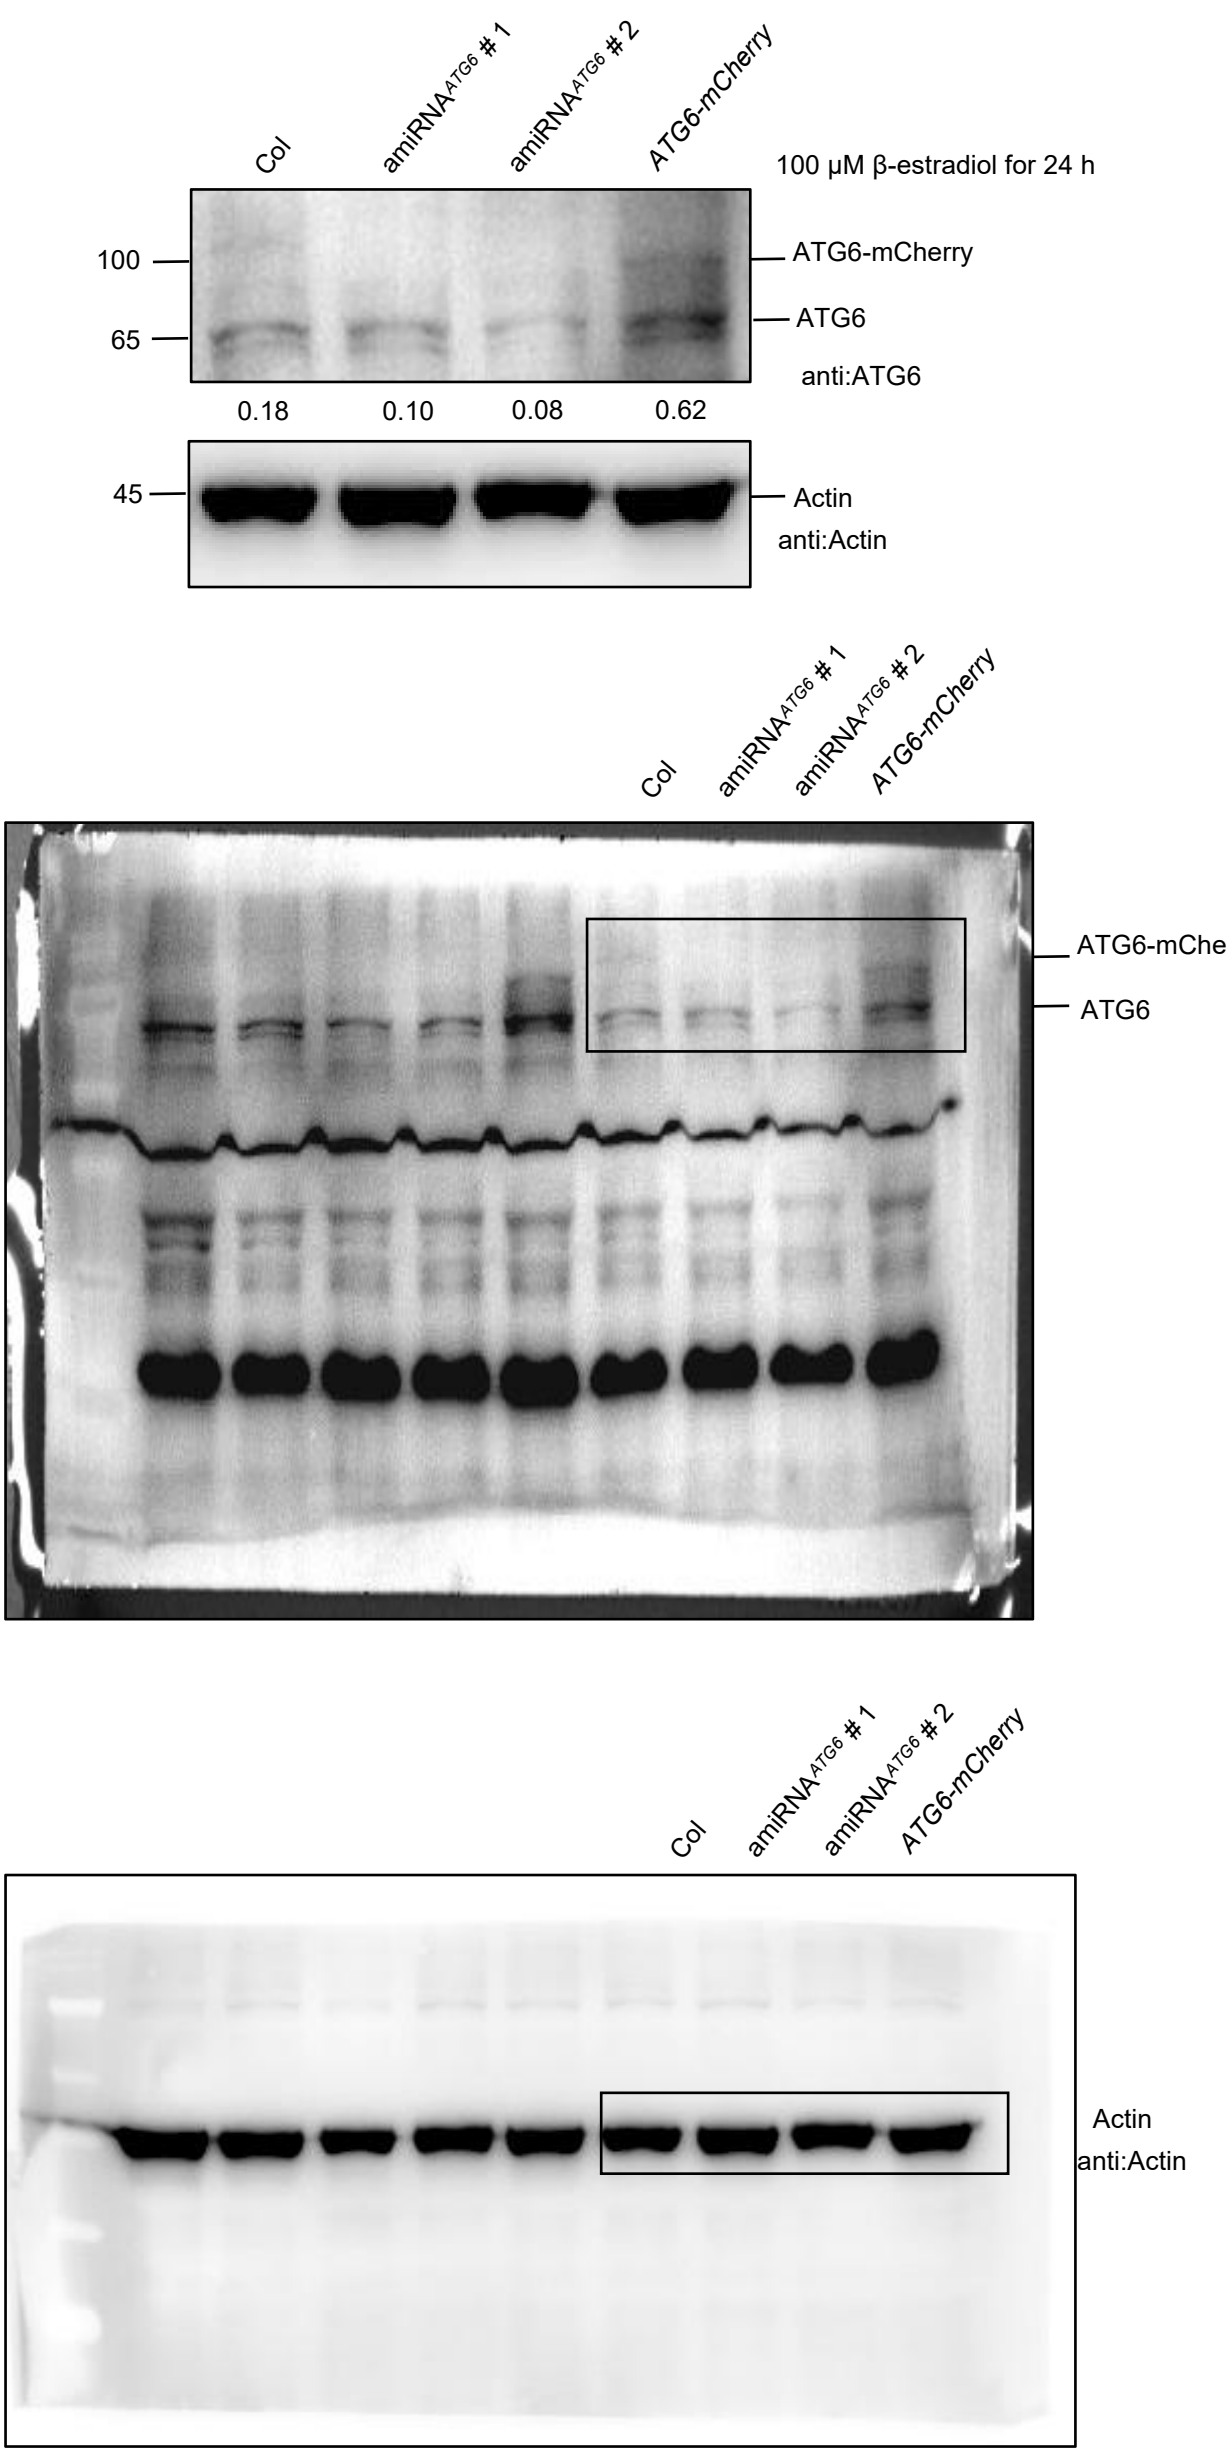

Figure 7-figure supplement 1. Verification of ATG6 antibody specificity.

Supplement: fig7-figsupp1-data2 [file elife-97206-fig7-figsupp1-data2-v1.zip]
